# Supplementary material for: A meta-analysis of caloric restriction gene expression profiles to infer common signatures and regulatory mechanisms
Source: Royal Society of Chemistry journal article supplement (doi:10.1039/c2mb05255e), 2012-02-10
Supplement: c2mb05255e_2.pdf [file c2mb05255e_2.pdf]

**Table S10: Genes differentially expressed with CR that have been validated by direct methods**

| <b>Gene symbol</b> | <b>Up- or down-regulated</b> | <b>Organism</b> | <b>Tissue</b> | <b>Method</b>               | <b>Reference</b>         |
|--------------------|------------------------------|-----------------|---------------|-----------------------------|--------------------------|
| Adh                | Down                         | Mouse           | Liver         | Enzyme Activity Measurement | (Hagopian, et al., 2008) |
| Adh                | Down                         | Rat             | Liver         | Enzyme Activity Measurement | (Feuers, et al., 1989)   |
| Car3               | Down                         | Mouse           | Liver         | qRT-PCR                     | (Dhahbi, et al., 2004)   |
| Cyp2e1             | Up                           | Rat             | Liver         | Enzyme Activity Measurement | (Ramaiah, et al., 2001)  |
| Cyp2f2             | Down                         | Mouse           | Liver         | qRT-PCR                     | (Tsuchiya, et al., 2004) |
| Cyp4a14            | Up                           | Mouse           | liver         | qRT-PCR                     | (Corton, et al., 2004)   |
| Cyp4a14            | Up                           | Mouse           | Liver         | qRT-PCR                     | (Tsuchiya, et al., 2004) |
| Cyp7a1             | Up                           | Mouse           | liver         | qRT-PCR                     | (Corton, et al., 2004)   |
| G0s2               | Down                         | Mouse           | Liver         | qRT-PCR                     | (Tsuchiya, et al., 2004) |
| Ghr                | Down                         | Mouse           | Liver         | qRT-PCR                     | (Estep, et al., 2009)    |
| Igfbp2             | Up                           | Mouse           | Liver         | qRT-PCR                     | (Tsuchiya, et al., 2004) |
| Mt1                | Up                           | Mouse           | Liver         | qRT-PCR                     | (Dhahbi, et al., 2004)   |
| Mt1                | Down                         | Mouse           | Liver         | qRT-PCR                     | (Tsuchiya, et al., 2004) |
| Mt1/2/3/4          | Up                           | Mouse           | Liver         | cadmium- binding assay      | (Kondoh, et al., 2002)   |
| Mt2                | Up                           | Mouse           | Liver         | Northern-blot analysis      | (Waelput, et al., 2000)  |
| Per2               | Up                           | Mouse           | Ovary         | qRT-PCR                     | (Sharov, et al., 2008)   |
| Pla2g12            | Up                           | Mouse           | liver         | qRT-PCR                     | (Corton, et al., 2004)   |
| Ppara              | Up                           | Mouse           | Liver         | qRT-PCR                     | (Selman, et al., 2006)   |
| Ppara              | Up                           | Mouse           | Liver         | qRT-PCR                     | (Tsuchiya, et al., 2004) |
| Ppara              | Up                           | Rat             | Liver         | sqRT-PCR                    | (Zhu, et al., 2004)      |
| Sc5d               | Down                         | Mouse           | liver         | qRT-PCR                     | (Corton, et al., 2004)   |
| Serpinh1           | Down                         | Mouse           | heart         | qRT-PCR                     | (Fu, et al., 2006)       |
| Serpinh1           | Down                         | Mouse           | liver         | qRT-PCR                     | (Fu, et al., 2006)       |
| Serpinh1           | Down                         | Mouse           | hypothalamus  | qRT-PCR                     | (Fu, et al., 2006)       |

|        |      |       |               |              |                          |
|--------|------|-------|---------------|--------------|--------------------------|
| Srebf1 | Down | Mouse | Spleen        | sqRT-PCR     | (Lamas, et al., 2003)    |
| Srebf1 | Down | Rat   | Liver         | sqRT-PCR     | (Zhu, et al., 2004)      |
| Srebf1 | Down | Rat   | Kidney        | Western blot | (Jiang, et al., 2005)    |
| Wee1   | Up   | Mouse | Mammary gland | qRT-PCR      | (Padovani, et al., 2009) |

## References

- Corton, J.C., *et al.* (2004) Mimetics of caloric restriction include agonists of lipid-activated nuclear receptors, *J Biol Chem*, **279**, 46204-46212.
- Dhahbi, J.M., *et al.* (2004) Temporal linkage between the phenotypic and genomic responses to caloric restriction, *Proc Natl Acad Sci U S A*, **101**, 5524-5529.
- Estep, P.W., 3rd, Warner, J.B. and Bulyk, M.L. (2009) Short-term calorie restriction in male mice feminizes gene expression and alters key regulators of conserved aging regulatory pathways, *PLoS One*, **4**, e5242.
- Feuers, R.J., *et al.* (1989) Effect of chronic caloric restriction on hepatic enzymes of intermediary metabolism in the male Fischer 344 rat, *Mech Ageing Dev*, **48**, 179-189.
- Fu, C., *et al.* (2006) Tissue specific and non-specific changes in gene expression by aging and by early stage CR, *Mech Ageing Dev*, **127**, 905-916.
- Hagopian, K., Ramsey, J.J. and Weindruch, R. (2008) Enzymes of glycerol and glyceraldehyde metabolism in mouse liver: effects of caloric restriction and age on activities, *Biosci Rep*, **28**, 107-115.
- Jiang, T., *et al.* (2005) Calorie restriction modulates renal expression of sterol regulatory element binding proteins, lipid accumulation, and age-related renal disease, *J Am Soc Nephrol*, **16**, 2385-2394.
- Kondoh, M., *et al.* (2002) Enhancement of MT synthesis by leptin in fasted mice, *Life Sci*, **71**, 2425-2433.
- Lamas, O., *et al.* (2003) NF-kappa B-binding activity in an animal diet-induced overweightness model and the impact of subsequent energy restriction, *Biochem Biophys Res Commun*, **311**, 533-539.
- Padovani, M., *et al.* (2009) Distinct effects of calorie restriction and exercise on mammary gland gene expression in C57BL/6 mice, *Cancer Prev Res (Phila)*, **2**, 1076-1087.
- Ramaiah, S.K., Apte, U. and Mehendale, H.M. (2001) Cytochrome P4502E1 induction increases thioacetamide liver injury in diet-restricted rats, *Drug Metab Dispos*, **29**, 1088-1095.
- Selman, C., *et al.* (2006) Coordinated multitissue transcriptional and plasma metabolomic profiles following acute caloric restriction in mice, *Physiol Genomics*, **27**, 187-200.
- Sharov, A.A., *et al.* (2008) Effects of aging and calorie restriction on the global gene expression profiles of mouse testis and ovary, *BMC Biol*, **6**, 24.
- Tsuchiya, T., *et al.* (2004) Additive regulation of hepatic gene expression by dwarfism and caloric restriction, *Physiol Genomics*, **17**, 307-315.
- Waelput, W., *et al.* (2000) Identification and expression analysis of leptin-regulated immediate early response and late target genes, *Biochem J*, **348 Pt 1**, 55-61.
- Zhu, M., *et al.* (2004) Circulating adiponectin levels increase in rats on caloric restriction: the potential for insulin sensitization, *Exp Gerontol*, **39**, 1049-1059.
