# Supplementary material for: A meta-analysis of caloric restriction gene expression profiles to infer common signatures and regulatory mechanisms
Source: Royal Society of Chemistry journal article supplement (doi:10.1039/c2mb05255e), 2012-02-10
Supplement: c2mb05255e_5.xls [file c2mb05255e_5.xls]

## Sheet: Genes_coexp
Table S5: List of genes co-expressed with genes enriched for overexpression (a,) and underexpression (b,) in CR
a,
Gene Symbol	p value	Gene Name
Rbp4	2.19E-35	retinol binding protein 4, plasma
Lpin1	8.10E-35	lipin 1
Gpd1	1.94E-33	glycerol-3-phosphate dehydrogenase 1 (soluble)
Thrsp	2.09E-33	thyroid hormone responsive SPOT14 homolog (Rattus)
Maob	5.43E-33	monoamine oxidase B
Lbp	2.75E-32	lipopolysaccharide binding protein
Tmem56	3.55E-32	transmembrane protein 56
Ephx2	5.38E-32	epoxide hydrolase 2, cytoplasmic
Cdo1	3.29E-31	cysteine dioxygenase 1, cytosolic
Pcx	8.88E-31	pyruvate carboxylase
Car3	1.94E-30	carbonic anhydrase 3
Sult1a1	2.02E-30	sulfotransferase family 1A, phenol-preferring, member 1
Pck1	9.39E-30	phosphoenolpyruvate carboxykinase 1, cytosolic
Cyp2d11///Cyp2d22///Cyp2d10	1.01E-29	cytochrome P450, family 2, subfamily d, polypeptide 11///cytochrome P450, family 2, subfamily d, polypeptide 22///cytochrome P450, family 2, subfamily d, polypeptide 10
Acad11///Nphp3	3.11E-29	acyl-Coenzyme A dehydrogenase family, member 11///nephronophthisis 3 (adolescent)
Tspan12	1.71E-28	tetraspanin 12
Abcd2	1.78E-28	ATP-binding cassette, sub-family D (ALD), member 2
Aldh1l1	2.71E-28	aldehyde dehydrogenase 1 family, member L1
Car14	3.02E-28	carbonic anhydrase 14
Nnmt	3.91E-28	nicotinamide N-methyltransferase
Hmgcs2	5.87E-28	3-hydroxy-3-methylglutaryl-Coenzyme A synthase 2
Cp	1.02E-27	ceruloplasmin
Fmo1	1.06E-27	flavin containing monooxygenase 1
Acaa1b	1.56E-27	acetyl-Coenzyme A acyltransferase 1B
Agt	1.77E-27	angiotensinogen (serpin peptidase inhibitor, clade A, member 8)
Pex11a	2.58E-27	peroxisomal biogenesis factor 11a
Lrg1	3.39E-27	leucine-rich alpha-2-glycoprotein 1
Vnn1	5.19E-27	vanin 1
Sardh	5.44E-27	sarcosine dehydrogenase
Cfh	8.02E-27	complement component factor h
C730029A08Rik	1.07E-26	RIKEN cDNA C730029A08 gene
Ppara	1.52E-26	peroxisome proliferator activated receptor alpha
Aox1	1.56E-26	aldehyde oxidase 1
Adh1	1.57E-26	alcohol dehydrogenase 1 (class I)
Cmbl	1.64E-26	carboxymethylenebutenolidase-like (Pseudomonas)
Ttpa	2.12E-26	tocopherol (alpha) transfer protein
Paqr9	2.34E-26	progestin and adipoQ receptor family member IX
Inmt	2.48E-26	indolethylamine N-methyltransferase
Ehhadh	3.52E-26	enoyl-Coenzyme A, hydratase/3-hydroxyacyl Coenzyme A dehydrogenase
Rhpn2	4.38E-26	rhophilin, Rho GTPase binding protein 2
Fah	5.37E-26	fumarylacetoacetate hydrolase
Cideb	5.66E-26	cell death-inducing DNA fragmentation factor, alpha subunit-like effector B
Col18a1	7.34E-26	collagen, type XVIII, alpha 1
Nt5e	1.17E-25	5' nucleotidase, ecto
Rarres2	1.27E-25	retinoic acid receptor responder (tazarotene induced) 2
Ndg2	1.51E-25	Nur77 downstream gene 2
Slc16a7	1.66E-25	solute carrier family 16 (monocarboxylic acid transporters), member 7
Agpat9///4933407I02Rik///4930458D05Rik	2.00E-25	1-acylglycerol-3-phosphate O-acyltransferase 9///RIKEN cDNA 4933407I02 gene///RIKEN cDNA 4930458D05 gene
Agtr1a	2.23E-25	angiotensin II receptor, type 1a
Naprt1	2.36E-25	nicotinate phosphoribosyltransferase domain containing 1
Cyp27a1	2.60E-25	cytochrome P450, family 27, subfamily a, polypeptide 1
Acsl1	2.70E-25	acyl-CoA synthetase long-chain family member 1
Gstt1	2.86E-25	glutathione S-transferase, theta 1
Tmem195	3.16E-25	transmembrane protein 195
Rgn	3.24E-25	regucalcin
Reep6	3.25E-25	receptor accessory protein 6
G0s2	3.81E-25	G0/G1 switch gene 2
Phyh	4.85E-25	phytanoyl-CoA hydroxylase
Prlr	7.96E-25	prolactin receptor
Pdk4	9.11E-25	pyruvate dehydrogenase kinase, isoenzyme 4
Gldc	1.11E-24	glycine decarboxylase
Palmd	1.21E-24	palmdelphin
Gsta3	1.28E-24	glutathione S-transferase, alpha 3
Hpgd	1.48E-24	hydroxyprostaglandin dehydrogenase 15 (NAD)
Adhfe1	1.76E-24	alcohol dehydrogenase, iron containing, 1
Cyp2e1	2.78E-24	cytochrome P450, family 2, subfamily e, polypeptide 1
Dgat2	3.02E-24	diacylglycerol O-acyltransferase 2
Abca8a	4.24E-24	ATP-binding cassette, sub-family A (ABC1), member 8a
Pcbd1	5.54E-24	pterin 4 alpha carbinolamine dehydratase/dimerization cofactor of hepatocyte nuclear factor 1 alpha (TCF1) 1
Fxyd1	6.22E-24	FXYD domain-containing ion transport regulator 1
Acox1	7.73E-24	acyl-Coenzyme A oxidase 1, palmitoyl
Pxmp2	8.19E-24	peroxisomal membrane protein 2
Aspa	9.76E-24	aspartoacylase (aminoacylase) 2
2310007H09Rik	1.42E-23	RIKEN cDNA 2310007H09 gene
Amacr	1.55E-23	alpha-methylacyl-CoA racemase
Fabp4	1.55E-23	fatty acid binding protein 4, adipocyte
Bckdhb	1.58E-23	branched chain ketoacid dehydrogenase E1, beta polypeptide
Gnmt	1.66E-23	glycine N-methyltransferase
Gpld1	1.84E-23	glycosylphosphatidylinositol specific phospholipase D1
Tst	2.20E-23	thiosulfate sulfurtransferase, mitochondrial
Gamt	2.28E-23	guanidinoacetate methyltransferase
Aldh1a7	2.63E-23	aldehyde dehydrogenase family 1, subfamily A7
Nudt12	3.03E-23	nudix (nucleoside diphosphate linked moiety X)-type motif 12
Aass	3.86E-23	aminoadipate-semialdehyde synthase
Bche	4.64E-23	butyrylcholinesterase
1190003J15Rik	4.75E-23	RIKEN cDNA 1190003J15 gene
Rnase4///Ang	4.82E-23	ribonuclease, RNase A family 4///angiogenin, ribonuclease, RNase A family, 5
Dpyd	5.36E-23	dihydropyrimidine dehydrogenase
Itih2	5.40E-23	inter-alpha trypsin inhibitor, heavy chain 2
Tcea3	5.71E-23	transcription elongation factor A (SII), 3
Gjb2	6.34E-23	gap junction protein, beta 2
Hist1h2bc	7.02E-23	histone cluster 1, H2bc
Acaa2	7.09E-23	acetyl-Coenzyme A acyltransferase 2 (mitochondrial 3-oxoacyl-Coenzyme A thiolase)
C4b	7.52E-23	complement component 4B (Childo blood group)
Amy1	1.02E-22	amylase 1, salivary
Pcsk6	1.36E-22	proprotein convertase subtilisin/kexin type 6
BC029169	1.38E-22	cDNA sequence BC029169
Chdh	1.58E-22	choline dehydrogenase
Angptl4	1.69E-22	angiopoietin-like 4
Ttr	1.99E-22	transthyretin
Fas	2.02E-22	Fas (TNF receptor superfamily member 6)
Lpl	2.34E-22	lipoprotein lipase
Elovl2	2.41E-22	elongation of very long chain fatty acids (FEN1/Elo2, SUR4/Elo3, yeast)-like 2
1300014I06Rik	2.46E-22	RIKEN cDNA 1300014I06 gene
Errfi1	3.06E-22	ERBB receptor feedback inhibitor 1
2310076L09Rik	3.21E-22	RIKEN cDNA 2310076L09 gene
Apoc1	4.81E-22	apolipoprotein C-I
Acy3	5.51E-22	aspartoacylase (aminoacylase) 3
Nrn1	6.02E-22	neuritin 1
Trf	7.07E-22	transferrin
Ephx1	7.93E-22	epoxide hydrolase 1, microsomal
Gls2	9.69E-22	glutaminase 2 (liver, mitochondrial)
Dcn	1.21E-21	decorin
Depdc6	1.29E-21	DEP domain containing 6
Klf15	1.33E-21	Kruppel-like factor 15
Gstk1	1.56E-21	glutathione S-transferase kappa 1
C1qc	2.04E-21	complement component 1, q subcomponent, C chain
ENSMUSG00000075547///Dhtkd1	2.06E-21	predicted gene, ENSMUSG00000075547///dehydrogenase E1 and transketolase domain containing 1
Por	2.34E-21	P450 (cytochrome) oxidoreductase
D630004K10Rik	2.46E-21	RIKEN cDNA D630004K10 gene
Gjb1	2.61E-21	gap junction protein, beta 1
Baiap2l1	2.63E-21	BAI1-associated protein 2-like 1
Cml1	2.74E-21	camello-like 1
Rassf6	2.87E-21	Ras association (RalGDS/AF-6) domain family 6
Ndrg2	3.24E-21	N-myc downstream regulated gene 2
Igfbp3	3.63E-21	insulin-like growth factor binding protein 3
Rdh5	4.48E-21	retinol dehydrogenase 5
Cldn1	4.55E-21	claudin 1
Cebpa	5.05E-21	CCAAT/enhancer binding protein (C/EBP), alpha
LOC67527	5.33E-21	murine leukemia retrovirus
Cbs	5.41E-21	cystathionine beta-synthase
Atp8b1	6.59E-21	ATPase, class I, type 8B, member 1
Alb	6.82E-21	albumin
Selenbp1	7.54E-21	selenium binding protein 1
Tmem30b	1.08E-20	transmembrane protein 30B
Efna1	1.10E-20	ephrin A1
Enpep	1.33E-20	glutamyl aminopeptidase
Cth	2.10E-20	cystathionase (cystathionine gamma-lyase)
C1s	2.25E-20	complement component 1, s subcomponent
Gstt2	2.42E-20	glutathione S-transferase, theta 2
Papss2	2.59E-20	3'-phosphoadenosine 5'-phosphosulfate synthase 2
Gpt2	3.23E-20	glutamic pyruvate transaminase (alanine aminotransferase) 2
Keg1	3.56E-20	kidney expressed gene 1
Gchfr	3.97E-20	GTP cyclohydrolase I feedback regulator
Lgr4	4.71E-20	leucine-rich repeat-containing G protein-coupled receptor 4
Cyp39a1	4.97E-20	cytochrome P450, family 39, subfamily a, polypeptide 1
Lum	5.43E-20	lumican
Il15ra	5.75E-20	interleukin 15 receptor, alpha chain
Plscr2	6.06E-20	phospholipid scramblase 2
Ddc	7.09E-20	dopa decarboxylase
Rhobtb1	7.13E-20	Rho-related BTB domain containing 1
Csad	7.99E-20	cysteine sulfinic acid decarboxylase
Clu	8.89E-20	clusterin
Abhd3	9.71E-20	abhydrolase domain containing 3
Pon1	1.16E-19	paraoxonase 1
Mafb	1.33E-19	v-maf musculoaponeurotic fibrosarcoma oncogene family, protein B (avian)
Sult1d1	1.38E-19	sulfotransferase family 1D, member 1
Rbpms2	1.53E-19	RNA binding protein with multiple splicing 2
C730049O14Rik	1.80E-19	RIKEN cDNA C730049O14 gene
Hsd11b1	2.01E-19	hydroxysteroid 11-beta dehydrogenase 1
Rnf125	2.04E-19	ring finger protein 125
Nr1d1	2.21E-19	nuclear receptor subfamily 1, group D, member 1
Abcc9	2.88E-19	ATP-binding cassette, sub-family C (CFTR/MRP), member 9
Vtn	2.97E-19	vitronectin
Bbox1	3.36E-19	butyrobetaine (gamma), 2-oxoglutarate dioxygenase 1 (gamma-butyrobetaine hydroxylase)
Tmem166	3.60E-19	transmembrane protein 166
Hpn	4.47E-19	hepsin
Xdh	4.66E-19	xanthine dehydrogenase
Abhd14b	4.70E-19	abhydrolase domain containing 14b
5133401H06Rik	4.76E-19	RIKEN cDNA 5133401H06 gene
Tenc1	6.78E-19	tensin like C1 domain-containing phosphatase
Fmo5	7.36E-19	flavin containing monooxygenase 5
Acsm3	8.67E-19	acyl-CoA synthetase medium-chain family member 3
Apoe	8.71E-19	apolipoprotein E
Cd302	9.18E-19	CD302 antigen
Slc47a1	9.73E-19	solute carrier family 47, member 1
Cyp7a1	1.05E-18	cytochrome P450, family 7, subfamily a, polypeptide 1
0610040J01Rik	1.08E-18	RIKEN cDNA 0610040J01 gene
Fcgrt	1.31E-18	Fc receptor, IgG, alpha chain transporter
Osgin1	1.45E-18	oxidative stress induced growth inhibitor 1
Aldob	1.49E-18	aldolase 2, B isoform
Acot1	1.81E-18	acyl-CoA thioesterase 1
Sdc2	1.96E-18	syndecan 2
C3	2.29E-18	complement component 3
Phyhd1	2.37E-18	phytanoyl-CoA dioxygenase domain containing 1
C2	2.68E-18	complement component 2 (within H-2S)
Tfpi2	2.82E-18	tissue factor pathway inhibitor 2
Slc6a12	3.05E-18	solute carrier family 6 (neurotransmitter transporter, betaine/GABA), member 12
Scd1	3.63E-18	stearoyl-Coenzyme A desaturase 1
Bdh1	3.64E-18	3-hydroxybutyrate dehydrogenase, type 1
Ces3	4.09E-18	carboxylesterase 3
Tmem20	5.14E-18	transmembrane protein 20
Stard10	5.38E-18	START domain containing 10
Apoa1	5.39E-18	apolipoprotein A-I
Sod3	5.67E-18	superoxide dismutase 3, extracellular
Aldh1a1	6.81E-18	aldehyde dehydrogenase family 1, subfamily A1
Ankrd56	6.87E-18	ankyrin repeat domain 56
Gstm6	6.97E-18	glutathione S-transferase, mu 6
Gstm1	7.55E-18	glutathione S-transferase, mu 1
Lrrc3	1.03E-17	leucine rich repeat containing 3
Cyp2d9	1.16E-17	cytochrome P450, family 2, subfamily d, polypeptide 9
1110059G02Rik	1.19E-17	RIKEN cDNA 1110059G02 gene
Slc30a10	1.21E-17	solute carrier family 30, member 10
Acss2	1.23E-17	acyl-CoA synthetase short-chain family member 2
Ugt1a6a	1.29E-17	UDP glucuronosyltransferase 1 family, polypeptide A6A
C1qa	1.45E-17	complement component 1, q subcomponent, alpha polypeptide
Echdc3	1.58E-17	enoyl Coenzyme A hydratase domain containing 3
Slc27a2	1.70E-17	solute carrier family 27 (fatty acid transporter), member 2
Marco	1.74E-17	macrophage receptor with collagenous structure
Cd59a	1.92E-17	CD59a antigen
Bhmt	2.01E-17	betaine-homocysteine methyltransferase
Fggy	2.50E-17	FGGY carbohydrate kinase domain containing
Rnf128	3.10E-17	ring finger protein 128
Smoc1	3.26E-17	SPARC related modular calcium binding 1
Pter	3.37E-17	phosphotriesterase related
Hist2h3c2	3.39E-17	histone cluster 2, H3c2
Erbb3	3.45E-17	v-erb-b2 erythroblastic leukemia viral oncogene homolog 3 (avian)
Ptprb	3.73E-17	protein tyrosine phosphatase, receptor type, B
C1r	3.90E-17	complement component 1, r subcomponent
Selenbp2	4.40E-17	selenium binding protein 2
Hfe2	4.55E-17	hemochromatosis type 2 (juvenile) (human homolog)
1100001G20Rik	4.99E-17	RIKEN cDNA 1100001G20 gene
Fabp1	5.11E-17	fatty acid binding protein 1, liver
C630028N24Rik	6.46E-17	RIKEN cDNA C630028N24 gene
Acot3	6.59E-17	acyl-CoA thioesterase 3
Car8	8.41E-17	carbonic anhydrase 8
Apoc3	8.93E-17	apolipoprotein C-III
Uox	9.27E-17	urate oxidase
Cyp4a10	9.72E-17	cytochrome P450, family 4, subfamily a, polypeptide 10
4632417N05Rik	1.05E-16	RIKEN cDNA 4632417N05 gene
Bhmt2	1.06E-16	betaine-homocysteine methyltransferase 2
2810055F11Rik	1.11E-16	RIKEN cDNA 2810055F11 gene
Faah	1.15E-16	fatty acid amide hydrolase
F5	1.20E-16	coagulation factor V
Adssl1	1.21E-16	adenylosuccinate synthetase like 1
Ppp1r3b	1.31E-16	protein phosphatase 1, regulatory (inhibitor) subunit 3B
Ftcd	1.31E-16	formiminotransferase cyclodeaminase
Agxt2l1	1.38E-16	alanine-glyoxylate aminotransferase 2-like 1
Cpn1	1.68E-16	carboxypeptidase N, polypeptide 1
Mpzl2	1.83E-16	myelin protein zero-like 2
Apof	1.86E-16	apolipoprotein F
Optn	1.92E-16	optineurin
Echdc2	2.09E-16	enoyl Coenzyme A hydratase domain containing 2
Oplah	2.16E-16	5-oxoprolinase (ATP-hydrolysing)
Upp2	2.26E-16	uridine phosphorylase 2
Apoc4	2.67E-16	apolipoprotein C-IV
BC026782	2.70E-16	cDNA sequence BC026782
Cxcl12	3.03E-16	chemokine (C-X-C motif) ligand 12
Aldh6a1	3.14E-16	aldehyde dehydrogenase family 6, subfamily A1
Hspb8	3.38E-16	heat shock protein 8
Gpam	3.42E-16	glycerol-3-phosphate acyltransferase, mitochondrial
Sord	4.05E-16	sorbitol dehydrogenase
Hebp1	5.05E-16	heme binding protein 1
1110054M08Rik	5.19E-16	RIKEN cDNA 1110054M08 gene
Lyve1	5.92E-16	lymphatic vessel endothelial hyaluronan receptor 1
Hsd3b3	6.04E-16	hydroxy-delta-5-steroid dehydrogenase, 3 beta- and steroid delta-isomerase 3
Pparg	6.09E-16	peroxisome proliferator activated receptor gamma
Igfbp4	8.04E-16	insulin-like growth factor binding protein 4
Ccl9	8.13E-16	chemokine (C-C motif) ligand 9
Grb7	8.16E-16	growth factor receptor bound protein 7
Ak3l1	8.25E-16	adenylate kinase 3 alpha-like 1
4633401B06Rik	8.32E-16	RIKEN cDNA 4633401B06 gene
Rorc	9.67E-16	RAR-related orphan receptor gamma
Krt18	1.06E-15	keratin 18
C8g	1.07E-15	complement component 8, gamma subunit
C4bp	1.10E-15	complement component 4 binding protein
Ninj1	1.12E-15	ninjurin 1
Oaf	1.20E-15	OAF homolog (Drosophila)
Bckdha	1.37E-15	branched chain ketoacid dehydrogenase E1, alpha polypeptide
Sema4g	1.47E-15	sema domain, immunoglobulin domain (Ig), transmembrane domain (TM) and short cytoplasmic domain, (semaphorin) 4G
Rbp1	1.50E-15	retinol binding protein 1, cellular
Cyp4a31	1.56E-15	cytochrome P450, family 4, subfamily a, polypeptide 31
Slc16a12	1.71E-15	solute carrier family 16 (monocarboxylic acid transporters), member 12
Krt8	1.83E-15	keratin 8
Pah	2.38E-15	phenylalanine hydroxylase
Hacl1	2.44E-15	2-hydroxyacyl-CoA lyase 1
Cyp4f13	2.51E-15	cytochrome P450, family 4, subfamily f, polypeptide 13
Saa4	2.53E-15	serum amyloid A 4
Abat	2.73E-15	4-aminobutyrate aminotransferase
Optn///D2Bwg1072e	2.77E-15	optineurin///DNA segment, Chr 2, Brigham & Women's Genetics 1072 expressed
Igfbp2	3.04E-15	insulin-like growth factor binding protein 2
Tmem205	3.12E-15	transmembrane protein 205
4931408D14Rik	3.25E-15	RIKEN cDNA 4931408D14 gene
Cd1d1	3.96E-15	CD1d1 antigen
Hsd3b7	3.98E-15	hydroxy-delta-5-steroid dehydrogenase, 3 beta- and steroid delta-isomerase 7
Hgfac	4.19E-15	hepatocyte growth factor activator
Hpd	4.56E-15	4-hydroxyphenylpyruvic acid dioxygenase
Ccbl2	5.10E-15	cysteine conjugate-beta lyase 2
Cryz	5.12E-15	crystallin, zeta
Asgr2	5.27E-15	asialoglycoprotein receptor 2
Usp2	6.07E-15	ubiquitin specific peptidase 2
S3-12	6.34E-15	plasma membrane associated protein, S3-12
Slc46a1	6.65E-15	solute carrier family 46, member 1
Serpina3n	8.13E-15	serine (or cysteine) peptidase inhibitor, clade A, member 3N
5430421B17///Fzd4	8.14E-15	hypothetical protein 5430421B17///frizzled homolog 4 (Drosophila)
Ppargc1b	8.28E-15	peroxisome proliferative activated receptor, gamma, coactivator 1 beta
Ugt2b5	8.64E-15	UDP glucuronosyltransferase 2 family, polypeptide B5
Saa3	8.96E-15	serum amyloid A 3
AW112010	9.15E-15	expressed sequence AW112010
A330041D05Rik///Onecut2	9.20E-15	RIKEN cDNA A330041D05 gene///one cut domain, family member 2
Tgtp	9.33E-15	T-cell specific GTPase
Serpind1	9.47E-15	serine (or cysteine) peptidase inhibitor, clade D, member 1
Plg	9.61E-15	plasminogen
Dsc2	9.82E-15	desmocollin 2
Serpina11	1.04E-14	serine (or cysteine) peptidase inhibitor, clade A (alpha-1 antiproteinase, antitrypsin), member 11
8430408G22Rik	1.06E-14	RIKEN cDNA 8430408G22 gene
Otc	1.25E-14	ornithine transcarbamylase
Aqp11	1.25E-14	aquaporin 11
Trp53inp2	1.30E-14	transformation related protein 53 inducible nuclear protein 2
Grtp1	1.31E-14	GH regulated TBC protein 1
Dbp	1.36E-14	D site albumin promoter binding protein
Agpat2	1.37E-14	1-acylglycerol-3-phosphate O-acyltransferase 2 (lysophosphatidic acid acyltransferase, beta)
1110020G09Rik	1.38E-14	RIKEN cDNA 1110020G09 gene
Mbl1	1.48E-14	mannose binding lectin (A)
Tmem37	1.51E-14	transmembrane protein 37
Arg1	1.53E-14	arginase 1, liver
Npal1	1.54E-14	NIPA-like domain containing 1
Afm	1.64E-14	afamin
Alas2	1.69E-14	aminolevulinic acid synthase 2, erythroid
H2-T23	1.76E-14	histocompatibility 2, T region locus 23
Aqp1	1.78E-14	aquaporin 1
Serping1	1.84E-14	serine (or cysteine) peptidase inhibitor, clade G, member 1
Cfhr1	1.97E-14	complement factor H-related 1
Decr1	2.00E-14	2,4-dienoyl CoA reductase 1, mitochondrial
Pfkfb1	2.09E-14	6-phosphofructo-2-kinase/fructose-2,6-biphosphatase 1
Ppp1r3c	2.26E-14	protein phosphatase 1, regulatory (inhibitor) subunit 3C
Ugt2b34	2.28E-14	UDP glucuronosyltransferase 2 family, polypeptide B34
Serpinf1	2.31E-14	serine (or cysteine) peptidase inhibitor, clade F, member 1
Rora	2.50E-14	RAR-related orphan receptor alpha
Tcn2	2.55E-14	transcobalamin 2
LOC626578///Mpa2l	2.73E-14	macrophage activation 2 like LOC626578///macrophage activation 2 like
Foxa3	2.81E-14	forkhead box A3
Slc7a2	3.02E-14	solute carrier family 7 (cationic amino acid transporter, y+ system), member 2
Itih4	3.16E-14	inter alpha-trypsin inhibitor, heavy chain 4
ENSMUSG00000063303///Dsp	3.36E-14	predicted gene, ENSMUSG00000063303///desmoplakin
F2	3.49E-14	coagulation factor II
Ghr	4.15E-14	growth hormone receptor
Fgf1	4.18E-14	fibroblast growth factor 1
1810011O10Rik	4.83E-14	RIKEN cDNA 1810011O10 gene
Hist1h1c	4.85E-14	histone cluster 1, H1c
Cxadr	5.36E-14	coxsackievirus and adenovirus receptor
Reln	5.68E-14	reelin
4833411C07Rik	6.32E-14	RIKEN cDNA 4833411C07 gene
AI132487	6.60E-14	expressed sequence AI132487
Cyp2c68	6.62E-14	cytochrome P450, family 2, subfamily c, polypeptide 68
Tie1	6.97E-14	tyrosine kinase receptor 1
Tob1	7.09E-14	transducer of ErbB-2.1
Slc38a4	7.28E-14	solute carrier family 38, member 4
H2-Ab1	7.32E-14	histocompatibility 2, class II antigen A, beta 1
Gstm2	7.50E-14	glutathione S-transferase, mu 2
Thnsl2	7.77E-14	threonine synthase-like 2 (bacterial)
Tat	7.77E-14	tyrosine aminotransferase
Serpina3m	8.28E-14	serine (or cysteine) peptidase inhibitor, clade A, member 3M
Ugt2b36	8.40E-14	UDP glucuronosyltransferase 2 family, polypeptide B36
Arrdc3///1700023H06Rik	8.64E-14	arrestin domain containing 3///RIKEN cDNA 1700023H06 gene
D14Ertd449e	9.40E-14	DNA segment, Chr 14, ERATO Doi 449, expressed
Hist2h2aa2///Hist2h2aa1	9.52E-14	histone cluster 2, H2aa2///histone cluster 2, H2aa1
Bnip3	9.53E-14	BCL2/adenovirus E1B interacting protein 1, NIP3
Hrsp12	9.97E-14	heat-responsive protein 12
Sec14l2	1.03E-13	SEC14-like 2 (S. cerevisiae)
Dhdh	1.12E-13	dihydrodiol dehydrogenase (dimeric)
AI464131	1.15E-13	expressed sequence AI464131
Apol7a	1.20E-13	apolipoprotein L 7a
Defb1	1.22E-13	defensin beta 1
Cfi	1.37E-13	complement component factor i
Rarres1	1.38E-13	retinoic acid receptor responder (tazarotene induced) 1
Zbtb16	1.63E-13	zinc finger and BTB domain containing 16
Slc3a1	1.63E-13	solute carrier family 3, member 1
Chpt1///AU016128	1.68E-13	choline phosphotransferase 1///expressed sequence AU016128
Elovl6	2.03E-13	ELOVL family member 6, elongation of long chain fatty acids (yeast)
Gstm3	2.17E-13	glutathione S-transferase, mu 3
Fgg	2.24E-13	fibrinogen, gamma polypeptide
Ugt1a9	2.27E-13	UDP glucuronosyltransferase 1 family, polypeptide A9
Ela1	2.27E-13	elastase 1, pancreatic
AW111846	2.47E-13	expressed sequence AW111846
Cyp4f15	2.48E-13	cytochrome P450, family 4, subfamily f, polypeptide 15
Hrg	2.49E-13	histidine-rich glycoprotein
Prkaa2	2.51E-13	protein kinase, AMP-activated, alpha 2 catalytic subunit
Mgst1	2.57E-13	microsomal glutathione S-transferase 1
Itih5	2.84E-13	inter-alpha (globulin) inhibitor H5
Ddah1	2.93E-13	dimethylarginine dimethylaminohydrolase 1
Cyp7b1	3.04E-13	cytochrome P450, family 7, subfamily b, polypeptide 1
Cpt2	3.36E-13	carnitine palmitoyltransferase 2
Gc	3.47E-13	group specific component
Rdh1///Rdh9	3.78E-13	retinol dehydrogenase 1 (all trans)///retinol dehydrogenase 9
AU018778	3.80E-13	expressed sequence AU018778
2310040A07Rik	3.86E-13	RIKEN cDNA 2310040A07 gene
Ropn1l	4.45E-13	ropporin 1-like
Sgms2	4.70E-13	sphingomyelin synthase 2
Etfdh	4.93E-13	electron transferring flavoprotein, dehydrogenase
Aadat	5.13E-13	aminoadipate aminotransferase
Pkp2	5.39E-13	plakophilin 2
Cyp4b1	5.85E-13	cytochrome P450, family 4, subfamily b, polypeptide 1
Masp2	6.20E-13	mannan-binding lectin serine peptidase 2
Atf5	6.21E-13	activating transcription factor 5
Phlda1	6.46E-13	pleckstrin homology-like domain, family A, member 1
Hp	6.77E-13	haptoglobin
Aldh1b1	6.78E-13	aldehyde dehydrogenase 1 family, member B1
Pgcp	6.81E-13	plasma glutamate carboxypeptidase
Pafah2	7.74E-13	platelet-activating factor acetylhydrolase 2
Clec4f	7.80E-13	C-type lectin domain family 4, member f
Lims2	8.09E-13	LIM and senescent cell antigen like domains 2
Aqp8	8.10E-13	aquaporin 8
Slc13a3	8.72E-13	solute carrier family 13 (sodium-dependent dicarboxylate transporter), member 3
Gch1	8.77E-13	GTP cyclohydrolase 1
BC048546	9.99E-13	cDNA sequence BC048546
Cyp17a1	1.02E-12	cytochrome P450, family 17, subfamily a, polypeptide 1
Lcn2	1.08E-12	lipocalin 2
Gstz1	1.09E-12	glutathione transferase zeta 1 (maleylacetoacetate isomerase)
Tek	1.16E-12	endothelial-specific receptor tyrosine kinase
Anpep	1.16E-12	alanyl (membrane) aminopeptidase
Prodh2	1.18E-12	proline dehydrogenase (oxidase) 2
Mlxipl	1.19E-12	MLX interacting protein-like
Cebpb	1.24E-12	CCAAT/enhancer binding protein (C/EBP), beta
Apoa4	1.25E-12	apolipoprotein A-IV
Me1	1.26E-12	malic enzyme 1, NADP(+)-dependent, cytosolic
Gsta4	1.31E-12	glutathione S-transferase, alpha 4
Dhrs3	1.35E-12	dehydrogenase/reductase (SDR family) member 3
Met	1.36E-12	met proto-oncogene
Itih1	1.38E-12	inter-alpha trypsin inhibitor, heavy chain 1
Es22	1.43E-12	esterase 22
Cyp8b1	1.48E-12	cytochrome P450, family 8, subfamily b, polypeptide 1
Aldh8a1	1.51E-12	aldehyde dehydrogenase 8 family, member A1
Iyd	1.59E-12	iodotyrosine deiodinase
Pdk2	1.61E-12	pyruvate dehydrogenase kinase, isoenzyme 2
2210023G05Rik	1.63E-12	RIKEN cDNA 2210023G05 gene
Hsdl2	1.65E-12	hydroxysteroid dehydrogenase like 2
Kng1	1.72E-12	kininogen 1
Dpt	1.72E-12	dermatopontin
1810008I18Rik	1.75E-12	RIKEN cDNA 1810008I18 gene
Depdc7	1.85E-12	DEP domain containing 7
Amdhd1	1.97E-12	amidohydrolase domain containing 1
Gstt3	2.00E-12	glutathione S-transferase, theta 3
AI195470	2.07E-12	expressed sequence AI195470
Pla1a	2.08E-12	phospholipase A1 member A
Igfals	2.16E-12	insulin-like growth factor binding protein, acid labile subunit
Dbt	2.20E-12	dihydrolipoamide branched chain transacylase E2
Pygl	2.25E-12	liver glycogen phosphorylase
Pm20d1	2.28E-12	peptidase M20 domain containing 1
Ech1	2.28E-12	enoyl coenzyme A hydratase 1, peroxisomal
Cyp2c70	2.30E-12	cytochrome P450, family 2, subfamily c, polypeptide 70
Slc10a1	2.37E-12	solute carrier family 10 (sodium/bile acid cotransporter family), member 1
Vegfa	2.39E-12	vascular endothelial growth factor A
Vnn3	2.43E-12	vanin 3
Grhpr	2.44E-12	glyoxylate reductase/hydroxypyruvate reductase
Tmem53	2.47E-12	transmembrane protein 53
B230114P17Rik	2.54E-12	RIKEN cDNA B230114P17 gene
Gpc4	2.67E-12	glypican 4
Cyp3a25	2.73E-12	cytochrome P450, family 3, subfamily a, polypeptide 25
Per2	2.75E-12	period homolog 2 (Drosophila)
Acacb	2.88E-12	acetyl-Coenzyme A carboxylase beta
Spp1	3.01E-12	secreted phosphoprotein 1
ENSMUSG00000073738	3.19E-12	predicted gene, ENSMUSG00000073738
Herpud1	3.21E-12	homocysteine-inducible, endoplasmic reticulum stress-inducible, ubiquitin-like domain member 1
Gys2	3.29E-12	glycogen synthase 2
Rab20	3.46E-12	RAB20, member RAS oncogene family
Hpx	3.49E-12	hemopexin
Iqgap2	3.57E-12	IQ motif containing GTPase activating protein 2
Tpmt	3.63E-12	thiopurine methyltransferase
1100001H23Rik	3.77E-12	RIKEN cDNA 1100001H23 gene
Colec11	3.81E-12	collectin sub-family member 11
Ifit1	4.12E-12	interferon-induced protein with tetratricopeptide repeats 1
9030619P08Rik	4.19E-12	RIKEN cDNA 9030619P08 gene
Nr1i2	4.24E-12	nuclear receptor subfamily 1, group I, member 2
Fbp1	4.63E-12	fructose bisphosphatase 1
Akr1c13	4.87E-12	aldo-keto reductase family 1, member C13
Prox1	4.88E-12	prospero-related homeobox 1
Acadm	5.12E-12	acyl-Coenzyme A dehydrogenase, medium chain
Agxt	5.28E-12	alanine-glyoxylate aminotransferase
Acox2	5.44E-12	acyl-Coenzyme A oxidase 2, branched chain
2810451A06Rik	6.01E-12	RIKEN cDNA 2810451A06 gene
Kank1	6.07E-12	KN motif and ankyrin repeat domains 1
Ell2	6.45E-12	elongation factor RNA polymerase II 2
Galm	6.50E-12	galactose mutarotase
Ugt2b35	6.53E-12	UDP glucuronosyltransferase 2 family, polypeptide B35
S100a1	6.88E-12	S100 calcium binding protein A1
Nhsl1///6330590E21Rik	7.27E-12	NHS-like 1///RIKEN cDNA 6330590E21 gene
Kdr	7.62E-12	kinase insert domain protein receptor
C9	7.70E-12	complement component 9
Alas1	7.76E-12	aminolevulinic acid synthase 1
Aqp9	8.12E-12	aquaporin 9
Itih3	8.14E-12	inter-alpha trypsin inhibitor, heavy chain 3
Ahsg	8.71E-12	alpha-2-HS-glycoprotein
Tmem25	8.75E-12	transmembrane protein 25
Cyp4a12a	8.95E-12	cytochrome P450, family 4, subfamily a, polypeptide 12a
Mrap	8.99E-12	melanocortin 2 receptor accessory protein
2610528J11Rik	9.63E-12	RIKEN cDNA 2610528J11 gene
9530058B02Rik	1.01E-11	RIKEN cDNA 9530058B02 gene
Dsg2	1.05E-11	desmoglein 2
Creb3l3	1.10E-11	cAMP responsive element binding protein 3-like 3
Acot2	1.11E-11	acyl-CoA thioesterase 2
Tmprss6	1.12E-11	transmembrane serine protease 6
Arhgef5	1.19E-11	Rho guanine nucleotide exchange factor (GEF) 5
Cyp2d26	1.20E-11	cytochrome P450, family 2, subfamily d, polypeptide 26
Hadh	1.29E-11	hydroxyacyl-Coenzyme A dehydrogenase
Sdpr	1.35E-11	serum deprivation response
Hbb-b2	1.38E-11	hemoglobin, beta adult minor chain
Angptl3	1.47E-11	angiopoietin-like 3
As3mt	1.49E-11	arsenic (+3 oxidation state) methyltransferase
Slc6a13	1.55E-11	solute carrier family 6 (neurotransmitter transporter, GABA), member 13
Mosc1	1.58E-11	MOCO sulphurase C-terminal domain containing 1
Insc	1.60E-11	inscuteable homolog (Drosophila)
Pde3b	1.61E-11	phosphodiesterase 3B, cGMP-inhibited
Fcna	1.62E-11	ficolin A
Entpd8	1.80E-11	ectonucleoside triphosphate diphosphohydrolase 8
Hgd	1.82E-11	homogentisate 1, 2-dioxygenase
BC006662	1.90E-11	cDNA sequence BC006662
Cyp3a11	1.91E-11	cytochrome P450, family 3, subfamily a, polypeptide 11
Igtp	1.92E-11	interferon gamma induced GTPase
Acaa1a	1.98E-11	acetyl-Coenzyme A acyltransferase 1A
Apoa5	2.01E-11	apolipoprotein A-V
Acp5	2.04E-11	acid phosphatase 5, tartrate resistant
Azgp1	2.10E-11	alpha-2-glycoprotein 1, zinc
Zbtb20	2.17E-11	zinc finger and BTB domain containing 20
BC023892	2.19E-11	cDNA sequence BC023892
Hamp2	2.28E-11	hepcidin antimicrobial peptide 2
Pcsk9	2.38E-11	proprotein convertase subtilisin/kexin type 9
Akr1c6	2.46E-11	aldo-keto reductase family 1, member C6
Cyp3a13	2.52E-11	cytochrome P450, family 3, subfamily a, polypeptide 13
Slc25a13	2.54E-11	solute carrier family 25 (mitochondrial carrier, adenine nucleotide translocator), member 13
Krt19	2.63E-11	keratin 19
Acsm1	2.64E-11	acyl-CoA synthetase medium-chain family member 1
Wfdc2	2.72E-11	WAP four-disulfide core domain 2
Cxcl1	2.90E-11	chemokine (C-X-C motif) ligand 1
Adfp	3.01E-11	adipose differentiation related protein
F10	3.01E-11	coagulation factor X
2010003K15Rik	3.04E-11	RIKEN cDNA 2010003K15 gene
Cox7a1	3.07E-11	cytochrome c oxidase, subunit VIIa 1
Hspa1b	3.25E-11	heat shock protein 1B
Nr1h4	3.30E-11	nuclear receptor subfamily 1, group H, member 4
Pipox	3.51E-11	pipecolic acid oxidase
Dpys	3.64E-11	dihydropyrimidinase
H2-Q10	3.73E-11	histocompatibility 2, Q region locus 10
Gm944	3.83E-11	gene model 944, (NCBI)
Serpina1a	4.02E-11	serine (or cysteine) peptidase inhibitor, clade A, member 1a
Sec16b	4.07E-11	SEC16 homolog B (S. cerevisiae)
4931406C07Rik	4.18E-11	RIKEN cDNA 4931406C07 gene
Akr1c14	4.74E-11	aldo-keto reductase family 1, member C14
Rbpms	4.74E-11	RNA binding protein gene with multiple splicing
Slc43a1	4.79E-11	solute carrier family 43, member 1
1300002K09Rik	4.81E-11	RIKEN cDNA 1300002K09 gene
2410024N18Rik	5.08E-11	RIKEN cDNA 2410024N18 gene
Mreg	5.25E-11	melanoregulin
Pemt	5.42E-11	phosphatidylethanolamine N-methyltransferase
Lipc	5.46E-11	lipase, hepatic
Serpina4-ps1	5.48E-11	serine (or cysteine) peptidase inhibitor, clade A, member 4, pseudogene 1
Slc27a5	5.54E-11	solute carrier family 27 (fatty acid transporter), member 5
Lect2	5.63E-11	leukocyte cell-derived chemotaxin 2
Akr1b8///Akr1b7	5.72E-11	aldo-keto reductase family 1, member B8///aldo-keto reductase family 1, member B7
Inhbe	5.81E-11	inhibin beta E
Tns1	6.02E-11	tensin 1
4833442J19Rik	6.04E-11	RIKEN cDNA 4833442J19 gene
Tinagl	6.04E-11	tubulointerstitial nephritis antigen-like
0610012H03Rik	6.14E-11	RIKEN cDNA 0610012H03 gene
F11r	6.14E-11	F11 receptor
Rnase4	6.17E-11	ribonuclease, RNase A family 4
F7	6.18E-11	coagulation factor VII
Ocln	6.37E-11	occludin
Abca6	6.71E-11	ATP-binding cassette, sub-family A (ABC1), member 6
Ifi27	7.31E-11	interferon, alpha-inducible protein 27
2900026A02Rik	7.55E-11	RIKEN cDNA 2900026A02 gene
Apom	7.55E-11	apolipoprotein M
Cyp2a5	7.55E-11	cytochrome P450, family 2, subfamily a, polypeptide 5
Ang	7.92E-11	angiogenin, ribonuclease, RNase A family, 5
Ppp1r3g	8.14E-11	protein phosphatase 1, regulatory (inhibitor) subunit 3G
Fst	8.52E-11	follistatin
Cyp2c50	8.79E-11	cytochrome P450, family 2, subfamily c, polypeptide 50
BC004728	8.83E-11	cDNA sequence BC004728
D12Ertd647e	8.92E-11	DNA segment, Chr 12, ERATO Doi 647, expressed
Hibch	9.07E-11	3-hydroxyisobutyryl-Coenzyme A hydrolase
Apob	9.19E-11	apolipoprotein B
Uroc1	9.57E-11	urocanase domain containing 1
Dci	9.67E-11	dodecenoyl-Coenzyme A delta isomerase (3,2 trans-enoyl-Coenyme A isomerase)
Dbi	1.04E-10	diazepam binding inhibitor
Hal	1.06E-10	histidine ammonia lyase
Nr1h3	1.12E-10	nuclear receptor subfamily 1, group H, member 3
Onecut1	1.12E-10	one cut domain, family member 1
Ccrn4l	1.15E-10	CCR4 carbon catabolite repression 4-like (S. cerevisiae)
Foxq1	1.16E-10	forkhead box Q1
Tgm2	1.18E-10	transglutaminase 2, C polypeptide
Serpinf2	1.19E-10	serine (or cysteine) peptidase inhibitor, clade F, member 2
1810014F10Rik	1.20E-10	RIKEN cDNA 1810014F10 gene
Fahd1	1.25E-10	fumarylacetoacetate hydrolase domain containing 1
Clybl	1.26E-10	citrate lyase beta like
Cyp2j6	1.26E-10	cytochrome P450, family 2, subfamily j, polypeptide 6
Bhlhb2	1.31E-10	basic helix-loop-helix domain containing, class B2
Sgk2	1.33E-10	serum/glucocorticoid regulated kinase 2
Col15a1	1.36E-10	collagen, type XV
Shmt1	1.37E-10	serine hydroxymethyltransferase 1 (soluble)
Vwce	1.39E-10	von Willebrand factor C and EGF domains
H2-Eb1	1.41E-10	histocompatibility 2, class II antigen E beta
Ttc36	1.42E-10	tetratricopeptide repeat domain 36
Entpd5	1.42E-10	ectonucleoside triphosphate diphosphohydrolase 5
Akr1c19	1.44E-10	aldo-keto reductase family 1, member C19
Upb1	1.45E-10	ureidopropionase, beta
Cfb	1.49E-10	complement factor B
Proz	1.50E-10	protein Z, vitamin K-dependent plasma glycoprotein
Col6a3	1.52E-10	collagen, type VI, alpha 3
Cda	1.61E-10	cytidine deaminase
Lgals3bp	1.62E-10	lectin, galactoside-binding, soluble, 3 binding protein
Csrp3	1.62E-10	cysteine and glycine-rich protein 3
Orm1	1.66E-10	orosomucoid 1
Bgn	1.70E-10	biglycan
Dmgdh	1.71E-10	dimethylglycine dehydrogenase precursor
Pim3	1.72E-10	proviral integration site 3
Nags	1.80E-10	N-acetylglutamate synthase
St3gal5	1.94E-10	ST3 beta-galactoside alpha-2,3-sialyltransferase 5
Lyz2	1.95E-10	lysozyme 2
Scp2	1.95E-10	sterol carrier protein 2, liver
Akr1d1	1.99E-10	aldo-keto reductase family 1, member D1
EG667418///Phldb2	2.03E-10	predicted gene, EG667418///pleckstrin homology-like domain, family B, member 2
Apoh	2.11E-10	apolipoprotein H
Iigp2	2.16E-10	interferon inducible GTPase 2
AI606797///Acbd4	2.17E-10	expressed sequence AI606797///acyl-Coenzyme A binding domain containing 4
Slc23a1	2.28E-10	solute carrier family 23 (nucleobase transporters), member 1
Pctp	2.31E-10	phosphatidylcholine transfer protein
Apcs	2.31E-10	serum amyloid P-component
C130094E24	2.40E-10	hypothetical protein C130094E24
F12	2.53E-10	coagulation factor XII (Hageman factor)
Slc37a4	2.86E-10	solute carrier family 37 (glucose-6-phosphate transporter), member 4
Slc17a2	2.88E-10	solute carrier family 17 (sodium phosphate), member 2
Enpp2	3.29E-10	ectonucleotide pyrophosphatase/phosphodiesterase 2
Abca1	3.36E-10	ATP-binding cassette, sub-family A (ABC1), member 1
H6pd	3.42E-10	hexose-6-phosphate dehydrogenase (glucose 1-dehydrogenase)
Etnk2	3.42E-10	ethanolamine kinase 2
Cyp2d10	3.44E-10	cytochrome P450, family 2, subfamily d, polypeptide 10
Abhd6	3.54E-10	abhydrolase domain containing 6
Mug1	3.55E-10	murinoglobulin 1
Enpp1	3.74E-10	ectonucleotide pyrophosphatase/phosphodiesterase 1
Wbscr25///Cldn3	3.78E-10	Williams Beuren syndrome chromosome region 25 (human)///claudin 3
Cldn2	4.02E-10	claudin 2
Mgam///C79476	4.04E-10	maltase-glucoamylase///expressed sequence C79476
Slc38a3	4.54E-10	solute carrier family 38, member 3
Cyp2b9	4.57E-10	cytochrome P450, family 2, subfamily b, polypeptide 9
E130114A11Rik///Gyk	4.63E-10	RIKEN cDNA E130114A11 gene///glycerol kinase
Sema4a	4.67E-10	sema domain, immunoglobulin domain (Ig), transmembrane domain (TM) and short cytoplasmic domain, (semaphorin) 4A
Cyb5	4.74E-10	cytochrome b-5
Fcgr2b	4.81E-10	Fc receptor, IgG, low affinity IIb
Pbld	4.84E-10	phenazine biosynthesis-like protein domain containing
Lcat	4.96E-10	lecithin cholesterol acyltransferase
0610005C13Rik	5.21E-10	RIKEN cDNA 0610005C13 gene
Calml4	5.28E-10	calmodulin-like 4
Acot4	5.43E-10	acyl-CoA thioesterase 4
Gbp2	5.48E-10	guanylate nucleotide binding protein 2
Pank1	5.54E-10	pantothenate kinase 1
0610012D14Rik	5.64E-10	RIKEN cDNA 0610012D14 gene
Slc22a18	5.70E-10	solute carrier family 22 (organic cation transporter), member 18
Hnf4a	5.80E-10	hepatic nuclear factor 4, alpha
Col3a1	6.02E-10	collagen, type III, alpha 1
Gbe1	6.09E-10	glucan (1,4-alpha-), branching enzyme 1
Dhrs4	6.18E-10	dehydrogenase/reductase (SDR family) member 4
Tmem176a	6.42E-10	transmembrane protein 176A
AI427122	6.81E-10	expressed sequence AI427122
Fetub	7.35E-10	fetuin beta
Tm6sf2	7.81E-10	transmembrane 6 superfamily member 2
D430015B01Rik	7.83E-10	RIKEN cDNA D430015B01 gene
Nipsnap1	8.19E-10	4-nitrophenylphosphatase domain and non-neuronal SNAP25-like protein homolog 1 (C. elegans)
Ak3	8.23E-10	adenylate kinase 3
Insig1	8.43E-10	insulin induced gene 1
Fga	8.50E-10	fibrinogen, alpha polypeptide
Pcyt2	8.57E-10	phosphate cytidylyltransferase 2, ethanolamine
Abca8b	8.76E-10	ATP-binding cassette, sub-family A (ABC1), member 8b
Pon3	9.13E-10	paraoxonase 3
Hlf	9.26E-10	hepatic leukemia factor
9130016M20Rik	9.91E-10	RIKEN cDNA 9130016M20 gene
Pawr///2310001G03Rik	9.97E-10	PRKC, apoptosis, WT1, regulator///RIKEN cDNA 2310001G03 gene
Ccdc80	1.02E-09	coiled-coil domain containing 80
Serpina1d	1.02E-09	serine (or cysteine) peptidase inhibitor, clade A, member 1d
Cat	1.05E-09	catalase
Igfbp1	1.09E-09	insulin-like growth factor binding protein 1
Ifih1	1.13E-09	interferon induced with helicase C domain 1
Txnip	1.14E-09	thioredoxin interacting protein
Serpinc1	1.15E-09	serine (or cysteine) peptidase inhibitor, clade C (antithrombin), member 1
Mup1	1.23E-09	major urinary protein 1
Abcd3	1.29E-09	ATP-binding cassette, sub-family D (ALD), member 3
Ggcx	1.38E-09	gamma-glutamyl carboxylase
Agxt2	1.42E-09	alanine-glyoxylate aminotransferase 2
Mfsd2	1.44E-09	major facilitator superfamily domain containing 2
Tlcd2	1.55E-09	TLC domain containing 2
Slc25a20	1.57E-09	solute carrier family 25 (mitochondrial carnitine/acylcarnitine translocase), member 20
Hsd17b13	1.59E-09	hydroxysteroid (17-beta) dehydrogenase 13
Acadl	1.66E-09	acyl-Coenzyme A dehydrogenase, long-chain
Aldh9a1	1.66E-09	aldehyde dehydrogenase 9, subfamily A1
Oit3	1.69E-09	oncoprotein induced transcript 3
Gcat	1.70E-09	glycine C-acetyltransferase (2-amino-3-ketobutyrate-coenzyme A ligase)
Cps1	1.74E-09	carbamoyl-phosphate synthetase 1
Agmat	1.80E-09	agmatine ureohydrolase (agmatinase)
Lmo7	1.81E-09	LIM domain only 7
Gcdh	1.87E-09	glutaryl-Coenzyme A dehydrogenase
Hfe	1.90E-09	hemochromatosis
2810459M11Rik	1.91E-09	RIKEN cDNA 2810459M11 gene
0610010D20Rik	1.96E-09	RIKEN cDNA 0610010D20 gene
9530008L14Rik	1.97E-09	RIKEN cDNA 9530008L14 gene
Stbd1	1.98E-09	starch binding domain 1
Man1a	2.07E-09	mannosidase 1, alpha
Mme	2.09E-09	membrane metallo endopeptidase
Gadd45g	2.10E-09	growth arrest and DNA-damage-inducible 45 gamma
D4Bwg0951e	2.10E-09	DNA segment, Chr 4, Brigham & Women's Genetics 0951 expressed
Asl	2.16E-09	argininosuccinate lyase
Aldh4a1	2.31E-09	aldehyde dehydrogenase 4 family, member A1
Prodh	2.38E-09	proline dehydrogenase
BC013529	2.58E-09	cDNA sequence BC013529
Sqrdl	2.60E-09	sulfide quinone reductase-like (yeast)
Ldhd	2.64E-09	lactate dehydrogenase D
Serpina1b	2.64E-09	serine (or cysteine) preptidase inhibitor, clade A, member 1b
Slc40a1	2.78E-09	solute carrier family 40 (iron-regulated transporter), member 1
Spp2	2.79E-09	secreted phosphoprotein 2
Lgals4	2.81E-09	lectin, galactose binding, soluble 4
Raet1a	2.90E-09	retinoic acid early transcript 1, alpha
Rapgef4	3.04E-09	Rap guanine nucleotide exchange factor (GEF) 4
C1qb	3.09E-09	complement component 1, q subcomponent, beta polypeptide
Pklr	3.11E-09	pyruvate kinase liver and red blood cell
Homer2	3.17E-09	homer homolog 2 (Drosophila)
5830473C10Rik	3.23E-09	RIKEN cDNA 5830473C10 gene
Timd2	3.25E-09	T-cell immunoglobulin and mucin domain containing 2
Bmp2	3.39E-09	bone morphogenetic protein 2
Hsd17b7	3.54E-09	hydroxysteroid (17-beta) dehydrogenase 7
LOC435565///Iigp1	3.55E-09	interferon-inducible GTPase-like///interferon inducible GTPase 1
Gpr116	3.57E-09	G protein-coupled receptor 116
Gcgr	3.60E-09	glucagon receptor
Nr0b2	3.68E-09	nuclear receptor subfamily 0, group B, member 2
Pthr1	4.10E-09	parathyroid hormone receptor 1
Cidea	4.46E-09	cell death-inducing DNA fragmentation factor, alpha subunit-like effector A
Avpr1a	4.61E-09	arginine vasopressin receptor 1A
Ddt	4.90E-09	D-dopachrome tautomerase
Ndrg1	4.90E-09	N-myc downstream regulated gene 1
Pla2g12b	4.90E-09	phospholipase A2, group XIIB
Creg1	5.02E-09	cellular repressor of E1A-stimulated genes 1
Cpb2	5.15E-09	carboxypeptidase B2 (plasma)
Scn7a	5.18E-09	sodium channel, voltage-gated, type VII, alpha
Ces1	5.18E-09	carboxylesterase 1
Dpep1	5.26E-09	dipeptidase 1 (renal)
Igsf5	5.36E-09	immunoglobulin superfamily, member 5
Es1	5.45E-09	esterase 1
A530050D06Rik	5.49E-09	RIKEN cDNA A530050D06 gene
Fgb	5.51E-09	fibrinogen, B beta polypeptide
Plvap	5.61E-09	plasmalemma vesicle associated protein
Egfr	5.97E-09	epidermal growth factor receptor
1300017J02Rik	5.99E-09	RIKEN cDNA 1300017J02 gene
Cmtm8	6.08E-09	CKLF-like MARVEL transmembrane domain containing 8
Pdia5	6.41E-09	protein disulfide isomerase associated 5
Nid1	6.96E-09	nidogen 1
D630033O11Rik	7.04E-09	RIKEN cDNA D630033O11 gene
Serpina1c	7.13E-09	serine (or cysteine) peptidase inhibitor, clade A, member 1c
Irf6	7.24E-09	interferon regulatory factor 6
Masp1	7.32E-09	mannan-binding lectin serine peptidase 1
Alpl	7.92E-09	alkaline phosphatase, liver/bone/kidney
Cldn3	7.96E-09	claudin 3
Gckr	8.12E-09	glucokinase regulatory protein
Pnpla2	8.16E-09	patatin-like phospholipase domain containing 2
OTTMUSG00000000971	8.18E-09	predicted gene, OTTMUSG00000000971
Hamp	8.23E-09	hepcidin antimicrobial peptide
Cyp2j5	8.48E-09	cytochrome P450, family 2, subfamily j, polypeptide 5
Cyp2c37	8.51E-09	cytochrome P450, family 2. subfamily c, polypeptide 37
Steap4	8.60E-09	STEAP family member 4
Cxcl9	8.65E-09	chemokine (C-X-C motif) ligand 9
Emcn	9.40E-09	endomucin
Nr5a2	9.46E-09	nuclear receptor subfamily 5, group A, member 2
Tmem150	9.55E-09	transmembrane protein 150
Mst1	9.78E-09	macrophage stimulating 1 (hepatocyte growth factor-like)
Qpct	9.90E-09	glutaminyl-peptide cyclotransferase (glutaminyl cyclase)
Itgb5	1.03E-08	integrin beta 5
Decr2	1.05E-08	2-4-dienoyl-Coenzyme A reductase 2, peroxisomal
Asgr1	1.05E-08	asialoglycoprotein receptor 1
Cidec	1.05E-08	cell death-inducing DFFA-like effector c
H2-Aa	1.07E-08	histocompatibility 2, class II antigen A, alpha
Hagh	1.09E-08	hydroxyacyl glutathione hydrolase
Slc17a3	1.14E-08	solute carrier family 17 (sodium phosphate), member 3
Kcnj8	1.19E-08	potassium inwardly-rectifying channel, subfamily J, member 8
Pigr	1.21E-08	polymeric immunoglobulin receptor
Ptpn3	1.22E-08	protein tyrosine phosphatase, non-receptor type 3
Hsd17b4	1.23E-08	hydroxysteroid (17-beta) dehydrogenase 4
Qprt	1.24E-08	quinolinate phosphoribosyltransferase
Thbd	1.26E-08	thrombomodulin
Tff3	1.27E-08	trefoil factor 3, intestinal
Col4a1	1.27E-08	collagen, type IV, alpha 1
Vsig4	1.33E-08	V-set and immunoglobulin domain containing 4
Fmo2	1.33E-08	flavin containing monooxygenase 2
Acbd4	1.36E-08	acyl-Coenzyme A binding domain containing 4
Cpn2	1.38E-08	carboxypeptidase N, polypeptide 2
Eng	1.41E-08	endoglin
Pzp	1.50E-08	pregnancy zone protein
Rilp	1.58E-08	Rab interacting lysosomal protein
Ugt3a2	1.60E-08	UDP glycosyltransferases 3 family, polypeptide A2
Plcxd2	1.61E-08	phosphatidylinositol-specific phospholipase C, X domain containing 2
Acot12	1.67E-08	acyl-CoA thioesterase 12
2510049J12Rik	1.70E-08	RIKEN cDNA 2510049J12 gene
Cyp4a14	1.76E-08	cytochrome P450, family 4, subfamily a, polypeptide 14
Dhcr7	1.78E-08	7-dehydrocholesterol reductase
2310043N10Rik	1.84E-08	RIKEN cDNA 2310043N10 gene
EG624219	1.86E-08	predicted gene, EG624219
Fads2	1.92E-08	fatty acid desaturase 2
Mgll	2.00E-08	monoglyceride lipase
Brp44	2.01E-08	brain protein 44
Chpt1	2.04E-08	choline phosphotransferase 1
Crp	2.06E-08	C-reactive protein, pentraxin-related
Mup5	2.06E-08	major urinary protein 5
A1cf	2.08E-08	APOBEC1 complementation factor
Dnaic1	2.12E-08	dynein, axonemal, intermediate chain 1
Gstm4	2.19E-08	glutathione S-transferase, mu 4
Anks4b	2.24E-08	ankyrin repeat and sterile alpha motif domain containing 4B
Apobec1	2.41E-08	apolipoprotein B editing complex 1
Ngef	2.53E-08	neuronal guanine nucleotide exchange factor
Abcb4	2.59E-08	ATP-binding cassette, sub-family B (MDR/TAP), member 4
Plac8	2.78E-08	placenta-specific 8
Olfml1	2.86E-08	olfactomedin-like 1
Pla2g12a	2.87E-08	phospholipase A2, group XIIA
Col4a2	2.92E-08	collagen, type IV, alpha 2
Prss23	3.04E-08	protease, serine, 23
Cyp2f2	3.12E-08	cytochrome P450, family 2, subfamily f, polypeptide 2
LOC634731///A530080P10	3.12E-08	similar to sushi domain containing 1///hypothetical protein A530080P10
Ces6	3.15E-08	carboxylesterase 6
Inhbb	3.16E-08	inhibin beta-B
Klf2	3.21E-08	Kruppel-like factor 2 (lung)
Figf	3.23E-08	c-fos induced growth factor
Brp44l	3.29E-08	brain protein 44-like
BC025446	3.31E-08	cDNA sequence BC025446
Krt7	3.36E-08	keratin 7
Csrp2	3.39E-08	cysteine and glycine-rich protein 2
Tgfbi	3.51E-08	transforming growth factor, beta induced
Pxmp4	3.59E-08	peroxisomal membrane protein 4
Qdpr	3.87E-08	quinoid dihydropteridine reductase
Habp2	3.93E-08	hyaluronic acid binding protein 2
Abcg2	4.01E-08	ATP-binding cassette, sub-family G (WHITE), member 2
Fasn	4.01E-08	fatty acid synthase
Serpina10	4.01E-08	serine (or cysteine) peptidase inhibitor, clade A (alpha-1 antiproteinase, antitrypsin), member 10
Hba-a1	4.02E-08	hemoglobin alpha, adult chain 1
9130221J18Rik	4.03E-08	RIKEN cDNA 9130221J18 gene
Rhou	4.37E-08	ras homolog gene family, member U
Cd24a	4.43E-08	CD24a antigen
Parp16	4.49E-08	poly (ADP-ribose) polymerase family, member 16
1110038D17Rik	4.69E-08	RIKEN cDNA 1110038D17 gene
Kynu	4.72E-08	kynureninase (L-kynurenine hydrolase)
Echs1	5.08E-08	enoyl Coenzyme A hydratase, short chain, 1, mitochondrial
Slc22a1	5.19E-08	solute carrier family 22 (organic cation transporter), member 1
Slco1b2	5.26E-08	solute carrier organic anion transporter family, member 1b2
Eepd1	5.40E-08	endonuclease/exonuclease/phosphatase family domain containing 1
C1ql3///Pter	5.44E-08	C1q-like 3///phosphotriesterase related
Fbxo21	5.64E-08	F-box protein 21
Apoa2	5.67E-08	apolipoprotein A-II
Foxa1	5.72E-08	forkhead box A1
Lsr	5.79E-08	lipolysis stimulated lipoprotein receptor
Cyp2c44	5.89E-08	cytochrome P450, family 2, subfamily c, polypeptide 44
Gadd45a	6.38E-08	growth arrest and DNA-damage-inducible 45 alpha
Orm3	6.50E-08	orosomucoid 3
C8b	6.64E-08	complement component 8, beta subunit
Gck	6.90E-08	glucokinase
Trib3	7.07E-08	tribbles homolog 3 (Drosophila)
Ugt2b1	7.23E-08	UDP glucuronosyltransferase 2 family, polypeptide B1
1700020C11Rik	7.36E-08	RIKEN cDNA 1700020C11 gene
Nupr1	7.37E-08	nuclear protein 1
Hnmt	8.07E-08	histamine N-methyltransferase
Pecr	8.16E-08	peroxisomal trans-2-enoyl-CoA reductase
Slc2a2	8.28E-08	solute carrier family 2 (facilitated glucose transporter), member 2
BC021614	8.99E-08	cDNA sequence BC021614
Colec10	9.08E-08	collectin sub-family member 10
Fdx1	9.37E-08	ferredoxin 1
Mrc1	9.43E-08	mannose receptor, C type 1
Fdft1	9.55E-08	farnesyl diphosphate farnesyl transferase 1
Hist1h2bp	9.57E-08	histone cluster 1, H2bp
Arl4a	1.00E-07	ADP-ribosylation factor-like 4A
Car1	1.00E-07	carbonic anhydrase 1
Cd74	1.03E-07	CD74 antigen (invariant polypeptide of major histocompatibility complex, class II antigen-associated)
ENSMUSG00000074373///Apoa4	1.06E-07	predicted gene, ENSMUSG00000074373///apolipoprotein A-IV
Epas1	1.07E-07	endothelial PAS domain protein 1
Angptl2	1.09E-07	angiopoietin-like 2
Jup	1.10E-07	junction plakoglobin
1110003O08Rik	1.17E-07	RIKEN cDNA 1110003O08 gene
AI607873	1.20E-07	expressed sequence AI607873
Acads	1.20E-07	acyl-Coenzyme A dehydrogenase, short chain
Lifr	1.21E-07	leukemia inhibitory factor receptor
Akr1c12	1.22E-07	aldo-keto reductase family 1, member C12
Gpr56	1.29E-07	G protein-coupled receptor 56
Ccbl1	1.33E-07	cysteine conjugate-beta lyase 1
Ggt1	1.35E-07	gamma-glutamyltransferase 1
Slpi	1.40E-07	secretory leukocyte peptidase inhibitor
Acat1	1.46E-07	acetyl-Coenzyme A acetyltransferase 1
Cobll1	1.49E-07	Cobl-like 1
5730469M10Rik	1.50E-07	RIKEN cDNA 5730469M10 gene
Rbks	1.55E-07	ribokinase
Clec1b	1.56E-07	C-type lectin domain family 1, member b
Acta1	1.62E-07	actin, alpha 1, skeletal muscle
Khk	1.63E-07	ketohexokinase
Mgst2	1.67E-07	microsomal glutathione S-transferase 2
Abcc6	1.70E-07	ATP-binding cassette, sub-family C (CFTR/MRP), member 6
Chrnb1	1.74E-07	cholinergic receptor, nicotinic, beta polypeptide 1 (muscle)
B2m	1.75E-07	beta-2 microglobulin
Gstm7	1.77E-07	glutathione S-transferase, mu 7
Crot	1.78E-07	carnitine O-octanoyltransferase
Myc	1.82E-07	myelocytomatosis oncogene
1300001I01Rik	1.91E-07	RIKEN cDNA 1300001I01 gene
Col1a2	1.92E-07	collagen, type I, alpha 2
Fhl1	1.95E-07	four and a half LIM domains 1
4631416L12Rik	1.98E-07	RIKEN cDNA 4631416L12 gene
Adipoq	2.06E-07	adiponectin, C1Q and collagen domain containing
Alad	2.10E-07	aminolevulinate, delta-, dehydratase
Efemp1	2.16E-07	epidermal growth factor-containing fibulin-like extracellular matrix protein 1
Pla2g6	2.27E-07	phospholipase A2, group VI
LOC100042484///4732419C18Rik	2.29E-07	hypothetical protein LOC100042484///RIKEN cDNA 4732419C18 gene
Ifi202b	2.40E-07	interferon activated gene 202B
Aldh5a1	2.45E-07	aldhehyde dehydrogenase family 5, subfamily A1
Hrasls3	2.46E-07	HRAS like suppressor 3
Ifi47	2.48E-07	interferon gamma inducible protein 47
Vkorc1	2.48E-07	vitamin K epoxide reductase complex, subunit 1
Cdkn1c	2.59E-07	cyclin-dependent kinase inhibitor 1C (P57)
Ugt2a3	2.62E-07	UDP glucuronosyltransferase 2 family, polypeptide A3
Aadac	2.66E-07	arylacetamide deacetylase (esterase)
Prelp	2.77E-07	proline arginine-rich end leucine-rich repeat
Bphl	2.78E-07	biphenyl hydrolase-like (serine hydrolase, breast epithelial mucin-associated antigen)
Art3	2.85E-07	ADP-ribosyltransferase 3
Sall1	2.92E-07	sal-like 1 (Drosophila)
Dnase2b	3.11E-07	deoxyribonuclease II beta
Cd48	3.19E-07	CD48 antigen
Cyp51	3.23E-07	cytochrome P450, family 51
Etfb	3.24E-07	electron transferring flavoprotein, beta polypeptide
Sdc1	3.25E-07	syndecan 1
Casp12	3.28E-07	caspase 12
Proc	3.30E-07	protein C
Klkb1	3.32E-07	kallikrein B, plasma 1
Rdh7	3.37E-07	retinol dehydrogenase 7
Trim14	3.37E-07	tripartite motif-containing 14
Tcf21	3.41E-07	transcription factor 21
Gda	3.46E-07	guanine deaminase
Akap1	3.51E-07	A kinase (PRKA) anchor protein 1
Timd4	3.53E-07	T-cell immunoglobulin and mucin domain containing 4
5033411D12Rik	3.57E-07	RIKEN cDNA 5033411D12 gene
Pcolce	3.57E-07	procollagen C-endopeptidase enhancer protein
Lipa	3.58E-07	lysosomal acid lipase A
Cxcl10	3.63E-07	chemokine (C-X-C motif) ligand 10
Aebp1	3.78E-07	AE binding protein 1
Adra1b	3.84E-07	adrenergic receptor, alpha 1b
Ctsf	4.01E-07	cathepsin F
C80142///Myo1b	4.22E-07	expressed sequence C80142///myosin IB
Lama2	4.34E-07	laminin, alpha 2
H2-Q8	4.48E-07	histocompatibility 2, Q region locus 8
Kmo	4.97E-07	kynurenine 3-monooxygenase (kynurenine 3-hydroxylase)
Akr1c20	4.99E-07	aldo-keto reductase family 1, member C20
Acadvl	5.17E-07	acyl-Coenzyme A dehydrogenase, very long chain
Hspb6	5.20E-07	heat shock protein, alpha-crystallin-related, B6
Orm2	5.39E-07	orosomucoid 2
Ces5	5.41E-07	carboxylesterase 5
Hmgcl	5.42E-07	3-hydroxy-3-methylglutaryl-Coenzyme A lyase
Col6a2	5.46E-07	collagen, type VI, alpha 2
Echdc1	5.75E-07	enoyl Coenzyme A hydratase domain containing 1
Ass1	5.89E-07	argininosuccinate synthetase 1
Rgs16	6.01E-07	regulator of G-protein signaling 16
Aco1	6.21E-07	aconitase 1
Got1	6.25E-07	glutamate oxaloacetate transaminase 1, soluble
Col14a1	6.36E-07	collagen, type XIV, alpha 1
S100a9	6.60E-07	S100 calcium binding protein A9 (calgranulin B)
Cisd1	6.63E-07	CDGSH iron sulfur domain 1
Gsta2	6.63E-07	glutathione S-transferase, alpha 2 (Yc2)
Sepx1	6.70E-07	selenoprotein X 1
4432416J03Rik	6.82E-07	RIKEN cDNA 4432416J03 gene
Col1a1	7.04E-07	collagen, type I, alpha 1
Pdia2	7.40E-07	protein disulfide isomerase associated 2
Man2a1	7.43E-07	mannosidase 2, alpha 1
Apoc2	7.49E-07	apolipoprotein C-II
A130013F12Rik///Nfia	7.90E-07	RIKEN cDNA A130013F12 gene///nuclear factor I/A
Hao1	7.96E-07	hydroxyacid oxidase 1, liver
Fhit	8.06E-07	fragile histidine triad gene
Slc26a1	8.10E-07	solute carrier family 26 (sulfate transporter), member 1
Nr3c2	8.50E-07	nuclear receptor subfamily 3, group C, member 2
Cfp	9.00E-07	complement factor properdin
Chst13	9.18E-07	carbohydrate (chondroitin 4) sulfotransferase 13
Rdh16	9.28E-07	retinol dehydrogenase 16
Stab2	9.40E-07	stabilin 2
Comt	9.46E-07	catechol-O-methyltransferase
Fgl1	9.47E-07	fibrinogen-like protein 1
Rbm47	9.52E-07	RNA binding motif protein 47
Cav1	1.00E-06	caveolin, caveolae protein 1
Trfr2	1.05E-06	transferrin receptor 2
Adipor2	1.05E-06	adiponectin receptor 2
Mknk2	1.06E-06	MAP kinase-interacting serine/threonine kinase 2
Slc10a6	1.12E-06	solute carrier family 10 (sodium/bile acid cotransporter family), member 6
Nlrp12	1.18E-06	NLR family, pyrin domain containing 12
BC031353	1.19E-06	cDNA sequence BC031353
Gyk	1.22E-06	glycerol kinase
Sc5d	1.24E-06	sterol-C5-desaturase (fungal ERG3, delta-5-desaturase) homolog (S. cerevisae)
Cfd	1.28E-06	complement factor D (adipsin)
6230424C14Rik	1.31E-06	RIKEN cDNA 6230424C14 gene
Haao	1.47E-06	3-hydroxyanthranilate 3,4-dioxygenase
Gpihbp1	1.48E-06	GPI-anchored HDL-binding protein 1
Ogn	1.49E-06	osteoglycin
Fabp2	1.52E-06	fatty acid binding protein 2, intestinal
Pglyrp2	1.54E-06	peptidoglycan recognition protein 2
Prtn3	1.54E-06	proteinase 3
Glyctk	1.56E-06	glycerate kinase
Leap2	1.60E-06	liver-expressed antimicrobial peptide 2
Pik3c2g	1.71E-06	phosphatidylinositol 3-kinase, C2 domain containing, gamma polypeptide
C8a	1.81E-06	complement component 8, alpha polypeptide
Pex11c	1.88E-06	peroxisomal biogenesis factor 11c
Nlrp6///D7Ertd187e	1.88E-06	NLR family, pyrin domain containing 6///DNA segment, Chr 7, ERATO Doi 187, expressed
Gsn	1.89E-06	gelsolin
Ddo	1.95E-06	D-aspartate oxidase
Epb4.1	1.96E-06	erythrocyte protein band 4.1
Idh1	2.00E-06	isocitrate dehydrogenase 1 (NADP+), soluble
Lamp2	2.01E-06	lysosomal-associated membrane protein 2
Rsad2	2.06E-06	radical S-adenosyl methionine domain containing 2
Ugt3a1	2.14E-06	UDP glycosyltransferases 3 family, polypeptide A1
Acta2	2.35E-06	actin, alpha 2, smooth muscle, aorta
Timp3	2.38E-06	tissue inhibitor of metalloproteinase 3
Perp	2.39E-06	PERP, TP53 apoptosis effector
Nr1i3	2.49E-06	nuclear receptor subfamily 1, group I, member 3
Sult1b1	2.50E-06	sulfotransferase family 1B, member 1
Isg20	2.53E-06	interferon-stimulated protein
Tdo2	2.55E-06	tryptophan 2,3-dioxygenase
Ltbp4	2.63E-06	latent transforming growth factor beta binding protein 4
Abcc3	2.65E-06	ATP-binding cassette, sub-family C (CFTR/MRP), member 3
Cd151	2.73E-06	CD151 antigen
Mat1a	2.80E-06	methionine adenosyltransferase I, alpha
Cdh5	2.84E-06	cadherin 5
Tnfaip2	2.85E-06	tumor necrosis factor, alpha-induced protein 2
Ctgf	2.86E-06	connective tissue growth factor
Gpx3	2.88E-06	glutathione peroxidase 3
Btd	3.03E-06	biotinidase
Ppm1k	3.36E-06	protein phosphatase 1K (PP2C domain containing)
Slc2a9	3.53E-06	solute carrier family 2 (facilitated glucose transporter), member 9
Tmem45a	3.56E-06	transmembrane protein 45a
Ctla2b	3.57E-06	cytotoxic T lymphocyte-associated protein 2 beta
Il18bp	3.63E-06	interleukin 18 binding protein
D130007H15Rik///Odz3	3.73E-06	RIKEN cDNA D130007H15 gene///odd Oz/ten-m homolog 3 (Drosophila)
Cobl	3.77E-06	cordon-bleu
Odz3	3.78E-06	odd Oz/ten-m homolog 3 (Drosophila)
5730410E15Rik	3.79E-06	RIKEN cDNA 5730410E15 gene
Sox6	3.87E-06	SRY-box containing gene 6
Inadl	4.04E-06	InaD-like (Drosophila)
Golt1a	4.06E-06	golgi transport 1 homolog A (S. cerevisiae)
Rhoj	4.07E-06	ras homolog gene family, member J
Gm2a	4.15E-06	GM2 ganglioside activator protein
Pros1	4.34E-06	protein S (alpha)
Cebpd	4.38E-06	CCAAT/enhancer binding protein (C/EBP), delta
Hsd3b6	4.61E-06	hydroxy-delta-5-steroid dehydrogenase, 3 beta- and steroid delta-isomerase 6
Copz2	4.65E-06	coatomer protein complex, subunit zeta 2
Rasd1	4.92E-06	RAS, dexamethasone-induced 1
Ifit3	4.96E-06	interferon-induced protein with tetratricopeptide repeats 3
2810007J24Rik	5.00E-06	RIKEN cDNA 2810007J24 gene
0610011F06Rik	5.05E-06	RIKEN cDNA 0610011F06 gene
Cdh2	5.09E-06	cadherin 2
Serpina7	5.11E-06	serine (or cysteine) peptidase inhibitor, clade A (alpha-1 antiproteinase, antitrypsin), member 7
EG13909	5.17E-06	predicted gene, EG13909
Hsd17b11	5.18E-06	hydroxysteroid (17-beta) dehydrogenase 11
Hsd17b2	5.18E-06	hydroxysteroid (17-beta) dehydrogenase 2
Arhgap29	5.31E-06	Rho GTPase activating protein 29
Hibadh	5.49E-06	3-hydroxyisobutyrate dehydrogenase
Hsd3b5	5.65E-06	hydroxy-delta-5-steroid dehydrogenase, 3 beta- and steroid delta-isomerase 5
Gimap4	5.69E-06	GTPase, IMAP family member 4
Gclm	5.81E-06	glutamate-cysteine ligase , modifier subunit
Nr1d2	5.83E-06	nuclear receptor subfamily 1, group D, member 2
F8	5.94E-06	coagulation factor VIII
Per1	6.12E-06	period homolog 1 (Drosophila)
Ly6a	6.34E-06	lymphocyte antigen 6 complex, locus A
Pink1	6.35E-06	PTEN induced putative kinase 1
Car5a	6.43E-06	carbonic anhydrase 5a, mitochondrial
Htatip2	6.45E-06	HIV-1 tat interactive protein 2, homolog (human)
C1qdc2	6.49E-06	C1q domain containing 2
Ifitm3	6.49E-06	interferon induced transmembrane protein 3
Tagln	6.55E-06	transgelin
Gmpr	6.80E-06	guanosine monophosphate reductase
Ctsh	6.90E-06	cathepsin H
Sephs2	7.02E-06	selenophosphate synthetase 2
Lipe	7.10E-06	lipase, hormone sensitive
Immp2l	7.18E-06	IMP2 inner mitochondrial membrane peptidase-like (S. cerevisiae)
Pstpip2	7.20E-06	proline-serine-threonine phosphatase-interacting protein 2
Cd5l	7.58E-06	CD5 antigen-like
Mosc2	7.62E-06	MOCO sulphurase C-terminal domain containing 2
Fkbp11	7.85E-06	FK506 binding protein 11
Nfib	8.14E-06	nuclear factor I/B
Cdc42bpg	8.16E-06	CDC42 binding protein kinase gamma (DMPK-like)
Suox	8.23E-06	sulfite oxidase
Tmem88	8.39E-06	transmembrane protein 88
Inhbc	8.39E-06	inhibin beta-C
Ceacam1	8.92E-06	CEA-related cell adhesion molecule 1
1700019D03Rik	9.41E-06	RIKEN cDNA 1700019D03 gene
LOC677369///A2m	9.81E-06	hypothetical protein LOC677369///alpha-2-macroglobulin
b,
Cp	3.44E-16	ceruloplasmin
Rarres2	5.81E-16	retinoic acid receptor responder (tazarotene induced) 2
Gbe1	4.04E-15	glucan (1,4-alpha-), branching enzyme 1
Cfh	4.22E-15	complement component factor h
Met	4.25E-15	met proto-oncogene
Lbp	5.20E-15	lipopolysaccharide binding protein
Cebpa	1.52E-14	CCAAT/enhancer binding protein (C/EBP), alpha
Fmo1	4.24E-14	flavin containing monooxygenase 1
Fas	9.49E-14	Fas (TNF receptor superfamily member 6)
Tspan12	1.06E-13	tetraspanin 12
Efna1	1.38E-13	ephrin A1
Hsd3b7	2.55E-13	hydroxy-delta-5-steroid dehydrogenase, 3 beta- and steroid delta-isomerase 7
Cmbl	2.56E-13	carboxymethylenebutenolidase-like (Pseudomonas)
Acsl1	3.00E-13	acyl-CoA synthetase long-chain family member 1
Rnase4///Ang	4.17E-13	ribonuclease, RNase A family 4///angiogenin, ribonuclease, RNase A family, 5
Nnmt	4.63E-13	nicotinamide N-methyltransferase
Cd59a	4.98E-13	CD59a antigen
Serpinf1	6.61E-13	serine (or cysteine) peptidase inhibitor, clade F, member 1
Xdh	1.15E-12	xanthine dehydrogenase
Car3	1.19E-12	carbonic anhydrase 3
Stbd1	1.29E-12	starch binding domain 1
Acaa2	1.36E-12	acetyl-Coenzyme A acyltransferase 2 (mitochondrial 3-oxoacyl-Coenzyme A thiolase)
Rbp4	1.72E-12	retinol binding protein 4, plasma
Fcgrt	2.57E-12	Fc receptor, IgG, alpha chain transporter
Sdc1	2.74E-12	syndecan 1
C1qa	2.80E-12	complement component 1, q subcomponent, alpha polypeptide
Col18a1	2.93E-12	collagen, type XVIII, alpha 1
Pparg	3.02E-12	peroxisome proliferator activated receptor gamma
Mafb	3.26E-12	v-maf musculoaponeurotic fibrosarcoma oncogene family, protein B (avian)
Pck1	3.89E-12	phosphoenolpyruvate carboxykinase 1, cytosolic
Scd1	3.93E-12	stearoyl-Coenzyme A desaturase 1
Ppp1r3b	4.45E-12	protein phosphatase 1, regulatory (inhibitor) subunit 3B
Cdo1	4.54E-12	cysteine dioxygenase 1, cytosolic
Aldh1a7	4.66E-12	aldehyde dehydrogenase family 1, subfamily A7
Angptl4	4.93E-12	angiopoietin-like 4
Mgst1	5.09E-12	microsomal glutathione S-transferase 1
Tenc1	6.15E-12	tensin like C1 domain-containing phosphatase
Cebpb	6.88E-12	CCAAT/enhancer binding protein (C/EBP), beta
Sult1a1	7.61E-12	sulfotransferase family 1A, phenol-preferring, member 1
Pcx	7.76E-12	pyruvate carboxylase
Hfe	8.48E-12	hemochromatosis
Etfdh	1.07E-11	electron transferring flavoprotein, dehydrogenase
Gstt1	1.11E-11	glutathione S-transferase, theta 1
Enpep	1.12E-11	glutamyl aminopeptidase
Fabp4	1.12E-11	fatty acid binding protein 4, adipocyte
Acy3	1.12E-11	aspartoacylase (aminoacylase) 3
Ninj1	1.24E-11	ninjurin 1
C1qc	1.29E-11	complement component 1, q subcomponent, C chain
Ccl9	1.30E-11	chemokine (C-C motif) ligand 9
G0s2	1.30E-11	G0/G1 switch gene 2
Igfbp4	1.56E-11	insulin-like growth factor binding protein 4
Lyve1	1.62E-11	lymphatic vessel endothelial hyaluronan receptor 1
Krt8	1.68E-11	keratin 8
Lgals3bp	2.09E-11	lectin, galactoside-binding, soluble, 3 binding protein
Gamt	2.55E-11	guanidinoacetate methyltransferase
Ugt1a6a	2.58E-11	UDP glucuronosyltransferase 1 family, polypeptide A6A
Inmt	2.80E-11	indolethylamine N-methyltransferase
Selenbp1	3.00E-11	selenium binding protein 1
Adh1	3.16E-11	alcohol dehydrogenase 1 (class I)
Chpt1///AU016128	3.24E-11	choline phosphotransferase 1///expressed sequence AU016128
Fcgr2b	3.92E-11	Fc receptor, IgG, low affinity IIb
Lpl	4.90E-11	lipoprotein lipase
Nr1h3	5.13E-11	nuclear receptor subfamily 1, group H, member 3
C3	5.34E-11	complement component 3
Decr1	5.36E-11	2,4-dienoyl CoA reductase 1, mitochondrial
LOC677168	5.54E-11	similar to ISG15 ubiquitin-like modifier
Ggcx	5.56E-11	gamma-glutamyl carboxylase
Tfpi2	5.80E-11	tissue factor pathway inhibitor 2
Aox1	5.83E-11	aldehyde oxidase 1
Ephx2	6.55E-11	epoxide hydrolase 2, cytoplasmic
Cxcl12	8.11E-11	chemokine (C-X-C motif) ligand 12
Ephx1	8.98E-11	epoxide hydrolase 1, microsomal
Baiap2l1	9.39E-11	BAI1-associated protein 2-like 1
Ela1	1.04E-10	elastase 1, pancreatic
Thrsp	1.04E-10	thyroid hormone responsive SPOT14 homolog (Rattus)
Hist1h2bc	1.05E-10	histone cluster 1, H2bc
Rbpms	1.11E-10	RNA binding protein gene with multiple splicing
Krt18	1.13E-10	keratin 18
Gstm2	2.54E-10	glutathione S-transferase, mu 2
Ehhadh	2.62E-10	enoyl-Coenzyme A, hydratase/3-hydroxyacyl Coenzyme A dehydrogenase
H2-T23	2.99E-10	histocompatibility 2, T region locus 23
Slc22a1	3.02E-10	solute carrier family 22 (organic cation transporter), member 1
Adfp	3.27E-10	adipose differentiation related protein
Cd1d1	3.51E-10	CD1d1 antigen
Entpd5	3.93E-10	ectonucleoside triphosphate diphosphohydrolase 5
Csrp3	4.42E-10	cysteine and glycine-rich protein 3
Cyp4f13	4.80E-10	cytochrome P450, family 4, subfamily f, polypeptide 13
Sod3	5.00E-10	superoxide dismutase 3, extracellular
Cyp2e1	5.52E-10	cytochrome P450, family 2, subfamily e, polypeptide 1
Alas2	6.50E-10	aminolevulinic acid synthase 2, erythroid
Gpd1	7.19E-10	glycerol-3-phosphate dehydrogenase 1 (soluble)
Dhrs3	7.24E-10	dehydrogenase/reductase (SDR family) member 3
Hsd11b1	7.61E-10	hydroxysteroid 11-beta dehydrogenase 1
Lipa	8.17E-10	lysosomal acid lipase A
Cd302	8.26E-10	CD302 antigen
Vegfa	8.32E-10	vascular endothelial growth factor A
Atp8b1	9.88E-10	ATPase, class I, type 8B, member 1
Pter	1.08E-09	phosphotriesterase related
Cxcl9	1.36E-09	chemokine (C-X-C motif) ligand 9
Tst	1.54E-09	thiosulfate sulfurtransferase, mitochondrial
Pdia5	1.54E-09	protein disulfide isomerase associated 5
Apoc1	1.57E-09	apolipoprotein C-I
Pgcp	1.83E-09	plasma glutamate carboxypeptidase
Rnase4	1.85E-09	ribonuclease, RNase A family 4
ENSMUSG00000063303///Dsp	1.90E-09	predicted gene, ENSMUSG00000063303///desmoplakin
Dgat2	1.94E-09	diacylglycerol O-acyltransferase 2
Papss2	2.06E-09	3'-phosphoadenosine 5'-phosphosulfate synthase 2
Pon3	2.12E-09	paraoxonase 3
Gch1	2.24E-09	GTP cyclohydrolase 1
Ccdc80	2.32E-09	coiled-coil domain containing 80
Fah	2.40E-09	fumarylacetoacetate hydrolase
Vnn1	2.55E-09	vanin 1
2310043N10Rik	2.59E-09	RIKEN cDNA 2310043N10 gene
Csrp2	2.69E-09	cysteine and glycine-rich protein 2
Cxadr	2.71E-09	coxsackievirus and adenovirus receptor
Atf5	2.76E-09	activating transcription factor 5
Saa3	2.98E-09	serum amyloid A 3
Eng	3.19E-09	endoglin
Dcn	3.74E-09	decorin
Lum	3.88E-09	lumican
Tcn2	4.14E-09	transcobalamin 2
Pcbd1	4.21E-09	pterin 4 alpha carbinolamine dehydratase/dimerization cofactor of hepatocyte nuclear factor 1 alpha (TCF1) 1
BC004728	4.35E-09	cDNA sequence BC004728
D12Ertd647e	4.39E-09	DNA segment, Chr 12, ERATO Doi 647, expressed
Hspb8	4.50E-09	heat shock protein 8
Insig1	4.58E-09	insulin induced gene 1
Serping1	4.76E-09	serine (or cysteine) peptidase inhibitor, clade G, member 1
Agt	5.02E-09	angiotensinogen (serpin peptidase inhibitor, clade A, member 8)
Ifitm3	5.11E-09	interferon induced transmembrane protein 3
Por	5.22E-09	P450 (cytochrome) oxidoreductase
Gpt2	5.30E-09	glutamic pyruvate transaminase (alanine aminotransferase) 2
Erbb3	5.95E-09	v-erb-b2 erythroblastic leukemia viral oncogene homolog 3 (avian)
Enpp1	6.05E-09	ectonucleotide pyrophosphatase/phosphodiesterase 1
Tmem56	6.17E-09	transmembrane protein 56
Ptprb	6.22E-09	protein tyrosine phosphatase, receptor type, B
Smoc1	7.12E-09	SPARC related modular calcium binding 1
Lrg1	7.61E-09	leucine-rich alpha-2-glycoprotein 1
Cyp2j6	7.69E-09	cytochrome P450, family 2, subfamily j, polypeptide 6
Sqrdl	8.17E-09	sulfide quinone reductase-like (yeast)
Pafah2	8.69E-09	platelet-activating factor acetylhydrolase 2
Acp5	9.38E-09	acid phosphatase 5, tartrate resistant
S100a10	9.81E-09	S100 calcium binding protein A10 (calpactin)
Tmem176a	1.05E-08	transmembrane protein 176A
Il13ra1	1.16E-08	interleukin 13 receptor, alpha 1
Tmem37	1.20E-08	transmembrane protein 37
Tmem195	1.20E-08	transmembrane protein 195
Ifih1	1.21E-08	interferon induced with helicase C domain 1
1100001G20Rik	1.24E-08	RIKEN cDNA 1100001G20 gene
Acox1	1.35E-08	acyl-Coenzyme A oxidase 1, palmitoyl
Phyh	1.36E-08	phytanoyl-CoA hydroxylase
Ces3	1.38E-08	carboxylesterase 3
Ropn1l	1.40E-08	ropporin 1-like
Maob	1.42E-08	monoamine oxidase B
Mup5	1.54E-08	major urinary protein 5
Arhgef5	1.76E-08	Rho guanine nucleotide exchange factor (GEF) 5
Galm	1.86E-08	galactose mutarotase
Slc16a7	1.90E-08	solute carrier family 16 (monocarboxylic acid transporters), member 7
Ifi27	1.98E-08	interferon, alpha-inducible protein 27
Man1a	1.99E-08	mannosidase 1, alpha
C1r	2.09E-08	complement component 1, r subcomponent
Phlda1	2.12E-08	pleckstrin homology-like domain, family A, member 1
Abca1	2.17E-08	ATP-binding cassette, sub-family A (ABC1), member 1
F11r	2.28E-08	F11 receptor
Amy1	2.30E-08	amylase 1, salivary
1100001H23Rik	2.36E-08	RIKEN cDNA 1100001H23 gene
Abcc9	2.37E-08	ATP-binding cassette, sub-family C (CFTR/MRP), member 9
LOC435565///Iigp1	2.42E-08	interferon-inducible GTPase-like///interferon inducible GTPase 1
Col14a1	2.45E-08	collagen, type XIV, alpha 1
Acta1	2.47E-08	actin, alpha 1, skeletal muscle
4833442J19Rik	2.63E-08	RIKEN cDNA 4833442J19 gene
Ghr	2.77E-08	growth hormone receptor
Akr1c13	2.86E-08	aldo-keto reductase family 1, member C13
Tinagl	2.99E-08	tubulointerstitial nephritis antigen-like
Pex11a	3.00E-08	peroxisomal biogenesis factor 11a
Slc27a2	3.00E-08	solute carrier family 27 (fatty acid transporter), member 2
H6pd	3.01E-08	hexose-6-phosphate dehydrogenase (glucose 1-dehydrogenase)
Acads	3.11E-08	acyl-Coenzyme A dehydrogenase, short chain
Hmgcs2	3.30E-08	3-hydroxy-3-methylglutaryl-Coenzyme A synthase 2
Tie1	3.39E-08	tyrosine kinase receptor 1
Hebp1	3.40E-08	heme binding protein 1
1810011O10Rik	3.48E-08	RIKEN cDNA 1810011O10 gene
Agpat2	3.74E-08	1-acylglycerol-3-phosphate O-acyltransferase 2 (lysophosphatidic acid acyltransferase, beta)
2310007H09Rik	3.92E-08	RIKEN cDNA 2310007H09 gene
Slc29a1	3.98E-08	solute carrier family 29 (nucleoside transporters), member 1
Creg1	4.05E-08	cellular repressor of E1A-stimulated genes 1
Hp	4.10E-08	haptoglobin
AI607873	4.56E-08	expressed sequence AI607873
Depdc6	4.73E-08	DEP domain containing 6
Keg1	4.76E-08	kidney expressed gene 1
1110054M08Rik	4.80E-08	RIKEN cDNA 1110054M08 gene
Gstt2	5.12E-08	glutathione S-transferase, theta 2
Slc38a4	5.20E-08	solute carrier family 38, member 4
Adhfe1	5.50E-08	alcohol dehydrogenase, iron containing, 1
Rgn	5.60E-08	regucalcin
Cxcl1	5.74E-08	chemokine (C-X-C motif) ligand 1
Gstk1	5.84E-08	glutathione S-transferase kappa 1
C1qb	6.15E-08	complement component 1, q subcomponent, beta polypeptide
B2m	6.39E-08	beta-2 microglobulin
C4b	6.57E-08	complement component 4B (Childo blood group)
H2-Q8	6.57E-08	histocompatibility 2, Q region locus 8
S100a1	6.61E-08	S100 calcium binding protein A1
Anpep	6.93E-08	alanyl (membrane) aminopeptidase
Trf	7.64E-08	transferrin
C1s	8.01E-08	complement component 1, s subcomponent
Abca8a	8.40E-08	ATP-binding cassette, sub-family A (ABC1), member 8a
Rhpn2	8.71E-08	rhophilin, Rho GTPase binding protein 2
Col3a1	8.89E-08	collagen, type III, alpha 1
Lox	8.92E-08	lysyl oxidase
Fn1	8.97E-08	fibronectin 1
Tnfrsf1a	9.11E-08	tumor necrosis factor receptor superfamily, member 1a
Vtn	9.81E-08	vitronectin
Bmp2	9.89E-08	bone morphogenetic protein 2
Dap	1.08E-07	death-associated protein
Apof	1.11E-07	apolipoprotein F
Lamp2	1.16E-07	lysosomal-associated membrane protein 2
Gjb2	1.16E-07	gap junction protein, beta 2
Ifit1	1.19E-07	interferon-induced protein with tetratricopeptide repeats 1
Sdpr	1.25E-07	serum deprivation response
Col5a2	1.26E-07	collagen, type V, alpha 2
C2	1.31E-07	complement component 2 (within H-2S)
Amacr	1.42E-07	alpha-methylacyl-CoA racemase
LOC626578///Mpa2l	1.42E-07	macrophage activation 2 like LOC626578///macrophage activation 2 like
Lyz2	1.43E-07	lysozyme 2
Uox	1.46E-07	urate oxidase
5133401H06Rik	1.48E-07	RIKEN cDNA 5133401H06 gene
Gsta3	1.54E-07	glutathione S-transferase, alpha 3
Col6a3	1.59E-07	collagen, type VI, alpha 3
BC013529	1.60E-07	cDNA sequence BC013529
AW112010	1.61E-07	expressed sequence AW112010
Trim14	1.65E-07	tripartite motif-containing 14
Trp53inp2	1.68E-07	transformation related protein 53 inducible nuclear protein 2
Tcea3	1.69E-07	transcription elongation factor A (SII), 3
Saa2	1.71E-07	serum amyloid A 2
Pdk4	1.72E-07	pyruvate dehydrogenase kinase, isoenzyme 4
Plscr2	1.73E-07	phospholipid scramblase 2
Fcna	1.74E-07	ficolin A
Bgn	1.78E-07	biglycan
Myom2	1.82E-07	myomesin 2
Prlr	1.84E-07	prolactin receptor
Lpin1	1.90E-07	lipin 1
Aldh1a1	1.91E-07	aldehyde dehydrogenase family 1, subfamily A1
Aqp1	1.96E-07	aquaporin 1
Slc46a1	1.97E-07	solute carrier family 46, member 1
Cyp4b1	2.01E-07	cytochrome P450, family 4, subfamily b, polypeptide 1
Tgm2	2.03E-07	transglutaminase 2, C polypeptide
Pygl	2.08E-07	liver glycogen phosphorylase
Tmem205	2.16E-07	transmembrane protein 205
Ugt1a9	2.17E-07	UDP glucuronosyltransferase 1 family, polypeptide A9
Myc	2.19E-07	myelocytomatosis oncogene
Kdr	2.21E-07	kinase insert domain protein receptor
Hbb-b2	2.28E-07	hemoglobin, beta adult minor chain
Acadl	2.36E-07	acyl-Coenzyme A dehydrogenase, long-chain
1300014I06Rik	2.44E-07	RIKEN cDNA 1300014I06 gene
Dsc2	2.45E-07	desmocollin 2
Pon1	2.74E-07	paraoxonase 1
Il15ra	2.74E-07	interleukin 15 receptor, alpha chain
Cyp27a1	2.84E-07	cytochrome P450, family 27, subfamily a, polypeptide 1
Anxa4	2.88E-07	annexin A4
Ikbke	2.90E-07	inhibitor of kappaB kinase epsilon
Thbs1	3.20E-07	thrombospondin 1
Mug1	3.21E-07	murinoglobulin 1
Ctsh	3.22E-07	cathepsin H
Me1	3.50E-07	malic enzyme 1, NADP(+)-dependent, cytosolic
Hist1h1c	3.52E-07	histone cluster 1, H1c
Ell2	3.52E-07	elongation factor RNA polymerase II 2
Mrc1	3.52E-07	mannose receptor, C type 1
Ndg2	3.59E-07	Nur77 downstream gene 2
1110059G02Rik	3.65E-07	RIKEN cDNA 1110059G02 gene
Hpgd	3.98E-07	hydroxyprostaglandin dehydrogenase 15 (NAD)
Angptl2	4.09E-07	angiopoietin-like 2
Agpat9///4933407I02Rik///4930458D05Rik	4.14E-07	1-acylglycerol-3-phosphate O-acyltransferase 9///RIKEN cDNA 4933407I02 gene///RIKEN cDNA 4930458D05 gene
Apoe	4.31E-07	apolipoprotein E
Agtr1a	4.32E-07	angiotensin II receptor, type 1a
Wfdc2	4.38E-07	WAP four-disulfide core domain 2
Acaa1b	4.64E-07	acetyl-Coenzyme A acyltransferase 1B
Ccbl2	4.78E-07	cysteine conjugate-beta lyase 2
Pawr///2310001G03Rik	5.00E-07	PRKC, apoptosis, WT1, regulator///RIKEN cDNA 2310001G03 gene
Irf7	5.12E-07	interferon regulatory factor 7
Marco	5.32E-07	macrophage receptor with collagenous structure
Rab20	5.48E-07	RAB20, member RAS oncogene family
Gbp2	5.82E-07	guanylate nucleotide binding protein 2
Cldn1	5.87E-07	claudin 1
Col1a1	5.94E-07	collagen, type I, alpha 1
Igfbp3	6.12E-07	insulin-like growth factor binding protein 3
Sardh	6.24E-07	sarcosine dehydrogenase
Ltbr	6.29E-07	lymphotoxin B receptor
Itih2	6.54E-07	inter-alpha trypsin inhibitor, heavy chain 2
Rhou	6.61E-07	ras homolog gene family, member U
Emp1	7.07E-07	epithelial membrane protein 1
Slc3a1	7.47E-07	solute carrier family 3, member 1
Nrp1	7.77E-07	neuropilin 1
Slc16a12	8.06E-07	solute carrier family 16 (monocarboxylic acid transporters), member 12
Adm	8.49E-07	adrenomedullin
Ddc	8.66E-07	dopa decarboxylase
Lsr	8.92E-07	lipolysis stimulated lipoprotein receptor
Gpc4	9.29E-07	glypican 4
Itgb5	9.45E-07	integrin beta 5
BC029169	9.59E-07	cDNA sequence BC029169
Gnmt	9.99E-07	glycine N-methyltransferase
H2-Aa	1.01E-06	histocompatibility 2, class II antigen A, alpha
Gpihbp1	1.02E-06	GPI-anchored HDL-binding protein 1
Slc12a7	1.03E-06	solute carrier family 12, member 7
Akr1c14	1.08E-06	aldo-keto reductase family 1, member C14
Fxyd1	1.09E-06	FXYD domain-containing ion transport regulator 1
Tmem30b	1.13E-06	transmembrane protein 30B
Rnf128	1.14E-06	ring finger protein 128
Pcsk6	1.21E-06	proprotein convertase subtilisin/kexin type 6
Plac8	1.22E-06	placenta-specific 8
Sdc2	1.28E-06	syndecan 2
C130094E24	1.31E-06	hypothetical protein C130094E24
Psmb8	1.40E-06	proteasome (prosome, macropain) subunit, beta type 8 (large multifunctional peptidase 7)
Thbd	1.40E-06	thrombomodulin
Mme	1.42E-06	membrane metallo endopeptidase
Tmem176b	1.46E-06	transmembrane protein 176B
Gpld1	1.56E-06	glycosylphosphatidylinositol specific phospholipase D1
Palmd	1.59E-06	palmdelphin
Dhrs4	1.63E-06	dehydrogenase/reductase (SDR family) member 4
Cxcl10	1.64E-06	chemokine (C-X-C motif) ligand 10
Lims2	1.68E-06	LIM and senescent cell antigen like domains 2
Cpt2	1.68E-06	carnitine palmitoyltransferase 2
Slc30a10	1.69E-06	solute carrier family 30, member 10
Stab1	1.78E-06	stabilin 1
Antxr2	1.85E-06	anthrax toxin receptor 2
1190003J15Rik	1.97E-06	RIKEN cDNA 1190003J15 gene
Col4a1	2.02E-06	collagen, type IV, alpha 1
Gstz1	2.11E-06	glutathione transferase zeta 1 (maleylacetoacetate isomerase)
Abcd2	2.14E-06	ATP-binding cassette, sub-family D (ALD), member 2
Bcl3	2.16E-06	B-cell leukemia/lymphoma 3
Krt19	2.19E-06	keratin 19
4931406C07Rik	2.22E-06	RIKEN cDNA 4931406C07 gene
Oaf	2.27E-06	OAF homolog (Drosophila)
Krt7	2.34E-06	keratin 7
Dbi	2.34E-06	diazepam binding inhibitor
Foxq1	2.40E-06	forkhead box Q1
H2-K1	2.42E-06	histocompatibility 2, K1, K region
Fbn1	2.45E-06	fibrillin 1
Aco1	2.46E-06	aconitase 1
Anxa1	2.51E-06	annexin A1
Bche	2.53E-06	butyrylcholinesterase
Tmem45a	2.62E-06	transmembrane protein 45a
Faah	2.79E-06	fatty acid amide hydrolase
Gadd45g	2.94E-06	growth arrest and DNA-damage-inducible 45 gamma
Cth	2.99E-06	cystathionase (cystathionine gamma-lyase)
Tgfbi	3.04E-06	transforming growth factor, beta induced
Tnfaip2	3.11E-06	tumor necrosis factor, alpha-induced protein 2
F5	3.28E-06	coagulation factor V
Cyb5	3.29E-06	cytochrome b-5
Hgfac	3.32E-06	hepatocyte growth factor activator
Iigp2	3.40E-06	interferon inducible GTPase 2
Masp1	3.49E-06	mannan-binding lectin serine peptidase 1
Mup1	3.50E-06	major urinary protein 1
Rhoj	3.51E-06	ras homolog gene family, member J
Myo1e	3.56E-06	myosin IE
Aebp1	3.57E-06	AE binding protein 1
Serpina12	3.60E-06	serine (or cysteine) peptidase inhibitor, clade A (alpha-1 antiproteinase, antitrypsin), member 12
OTTMUSG00000000971	3.60E-06	predicted gene, OTTMUSG00000000971
Apobec1	3.82E-06	apolipoprotein B editing complex 1
Cdh5	3.85E-06	cadherin 5
Lgals3	3.88E-06	lectin, galactose binding, soluble 3
Orm1	3.97E-06	orosomucoid 1
Cebpd	4.09E-06	CCAAT/enhancer binding protein (C/EBP), delta
Abcc3	4.14E-06	ATP-binding cassette, sub-family C (CFTR/MRP), member 3
Mbl1	4.17E-06	mannose binding lectin (A)
Aldh1l1	4.21E-06	aldehyde dehydrogenase 1 family, member L1
Selenbp2	4.41E-06	selenium binding protein 2
Gsn	4.45E-06	gelsolin
EG667418///Phldb2	4.57E-06	predicted gene, EG667418///pleckstrin homology-like domain, family B, member 2
Pstpip2	4.72E-06	proline-serine-threonine phosphatase-interacting protein 2
Lss	4.87E-06	lanosterol synthase
Ppara	5.03E-06	peroxisome proliferator activated receptor alpha
Tgtp	5.08E-06	T-cell specific GTPase
Ctla2b	5.28E-06	cytotoxic T lymphocyte-associated protein 2 beta
Ppp1r3c	5.37E-06	protein phosphatase 1, regulatory (inhibitor) subunit 3C
Hal	5.48E-06	histidine ammonia lyase
Rdh5	5.61E-06	retinol dehydrogenase 5
Isg20	5.67E-06	interferon-stimulated protein
Serpina3n	5.71E-06	serine (or cysteine) peptidase inhibitor, clade A, member 3N
Hsd3b5	5.78E-06	hydroxy-delta-5-steroid dehydrogenase, 3 beta- and steroid delta-isomerase 5
Hsd17b7	5.82E-06	hydroxysteroid (17-beta) dehydrogenase 7
Itih5	5.86E-06	inter-alpha (globulin) inhibitor H5
Hnmt	5.98E-06	histamine N-methyltransferase
Arg1	6.02E-06	arginase 1, liver
Gjb1	6.51E-06	gap junction protein, beta 1
Pctp	6.65E-06	phosphatidylcholine transfer protein
Gpx3	6.70E-06	glutathione peroxidase 3
Reep6	6.79E-06	receptor accessory protein 6
Kank1	6.80E-06	KN motif and ankyrin repeat domains 1
Axl	6.85E-06	AXL receptor tyrosine kinase
Bckdhb	6.85E-06	branched chain ketoacid dehydrogenase E1, beta polypeptide
Rorc	7.20E-06	RAR-related orphan receptor gamma
Igtp	7.26E-06	interferon gamma induced GTPase
Hamp2	7.29E-06	hepcidin antimicrobial peptide 2
Tns1	7.49E-06	tensin 1
Tspan4	7.66E-06	tetraspanin 4
Dpt	7.73E-06	dermatopontin
Hba-a1	7.78E-06	hemoglobin alpha, adult chain 1
C730049O14Rik	7.80E-06	RIKEN cDNA C730049O14 gene
BC023892	7.80E-06	cDNA sequence BC023892
Optn	7.90E-06	optineurin
H2-Ab1	8.01E-06	histocompatibility 2, class II antigen A, beta 1
Rnf125	8.07E-06	ring finger protein 125
Fcer1g	8.22E-06	Fc receptor, IgE, high affinity I, gamma polypeptide
Ldlr	8.34E-06	low density lipoprotein receptor
Cd74	8.75E-06	CD74 antigen (invariant polypeptide of major histocompatibility complex, class II antigen-associated)
D14Ertd449e	8.87E-06	DNA segment, Chr 14, ERATO Doi 449, expressed
Aldob	9.12E-06	aldolase 2, B isoform
Emr1	9.27E-06	EGF-like module containing, mucin-like, hormone receptor-like sequence 1
C80142///Myo1b	9.44E-06	expressed sequence C80142///myosin IB
2210023G05Rik	9.61E-06	RIKEN cDNA 2210023G05 gene
Sc5d	9.80E-06	sterol-C5-desaturase (fungal ERG3, delta-5-desaturase) homolog (S. cerevisae)
